# Supplementary material for: Wildfires Impact Assessment on PM Levels Using Generalized Additive Mixed Models
Source: MDPI journal article supplement (doi:10.3390/atmos14020231), 2023-01-24
Supplement: s1 [file s1]

Archive with 1 entries (1 files):
- atmosphere-2132278-supplementary.pdf
