# Supplementary material for: Wildfires Impact Assessment on PM Levels Using Generalized Additive Mixed Models
Source: MDPI journal article supplement (doi:10.3390/atmos14020231), 2023-01-24
Supplement: s1 [file s1 › atmosphere-2132278-supplementary.pdf]

# Wildfires Impact Assessment on PM Levels Using Generalized Additive Mixed Models

Gianluca Leone \*, Giorgio Cattani, Mariacarmela Cusano, Alessandra Gaeta, Guido Pellis, Marina Vitullo and Raffaele Morelli

Department for Environmental Evaluation, Control and Sustainability, Italian National Institute for Environmental Protection and Research (ISPRA), 00144 Rome, Italy; giorgio.cattani@isprambiente.it (G.C.); mariacarmela.cusano@isprambiente.it (M.C.); alessandra.gaeta@isprambiente.it (A.G.); guido.pellis@isprambiente.it (G.P.); marina.vitullo@isprambiente.it (M.V.); raffaele.morelli@isprambiente.it (R.M.)

\* Correspondence: gianluca.leone@isprambiente.it

**Cerano - Bagno IT1509A**

**Cerano - Bagno - IT1509A**

Fires within 75km from station

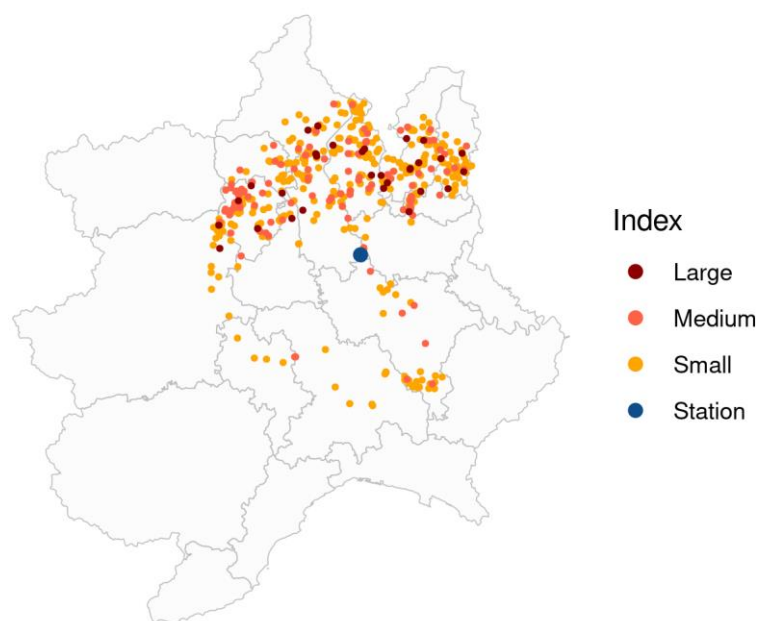

**Figure S1a.** Italy, Piedmont region: wildfires, classified by categorical index variable, within a buffer of 75 km from the air quality monitoring station.

**Table S1.** Italy, Piedmont region: descriptive statistics for wildfires, classified by categorical index variable, within a buffer of 75 km from the air quality monitoring station.

| Variable                  | n   | mean  | sd    | median  |
|---------------------------|-----|-------|-------|---------|
| Wooded land area (ha)     | 528 | 11.67 | 106.4 | 0.3231  |
| Not wooded land area (ha) | 230 | 7.972 | 25.96 | 0.08805 |
| Distance (km)             | 528 | 53.15 | 14.78 | 55.44   |
| Burned area (ha)          | 528 | 15.15 | 111.1 | 0.4375  |

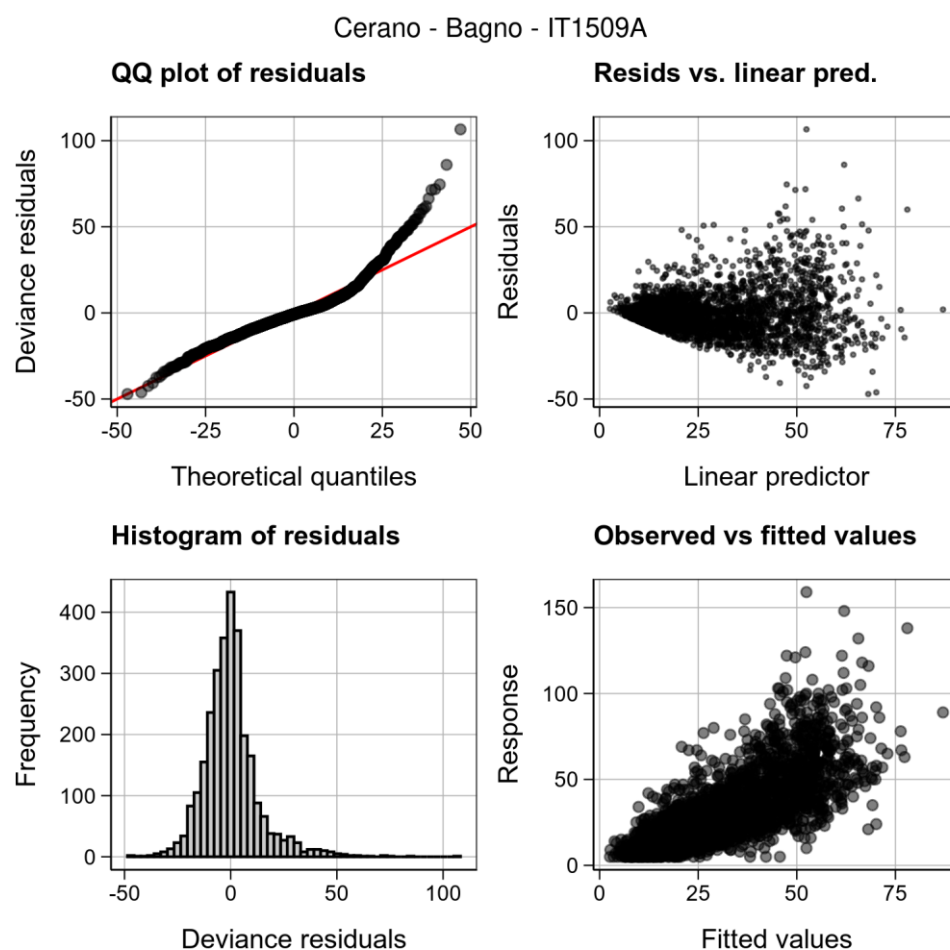**Figure S1b.** Check of the basic assumptions: residual analysis of the PM<sub>10</sub> model developed for the air quality monitoring station.

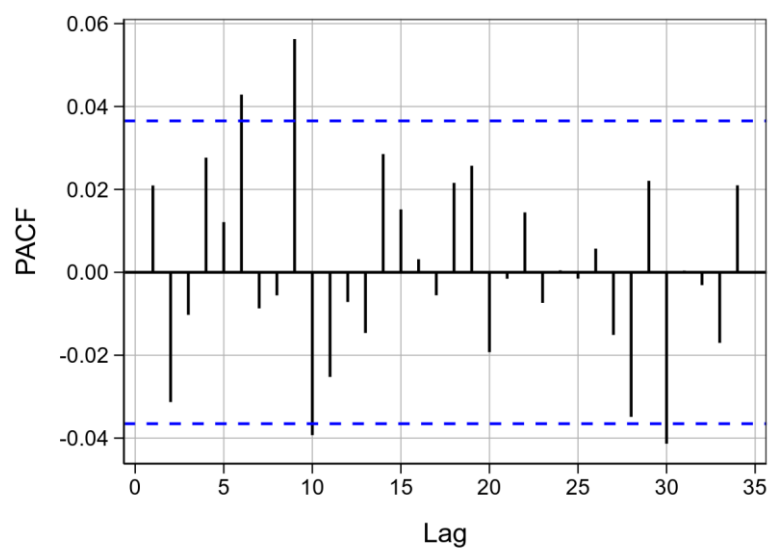

**Figure S1c.** Partial autocorrelation function (PACF) of the residuals at daily lags of the PM<sub>10</sub> model developed for the air quality monitoring station.

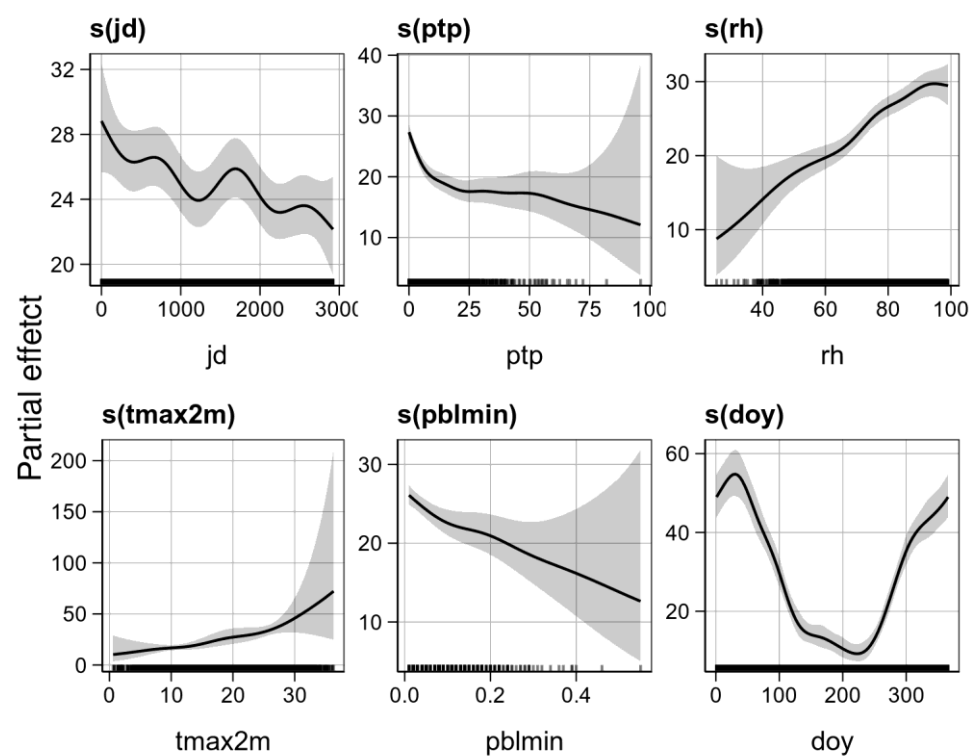

**Figure S1d.** Spline functions for single predictive variables selected in the PM<sub>10</sub> model developed for the air quality monitoring station.

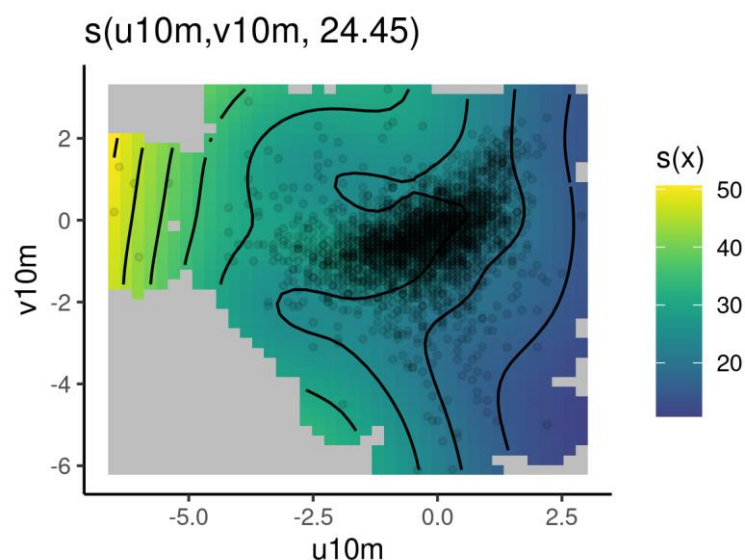

**Figure S1e.** Smooth surface for wind speed variables interaction ( $u_{10m}$ ,  $v_{10m}$ ) selected in the  $PM_{10}$  model developed for the air quality monitoring station.

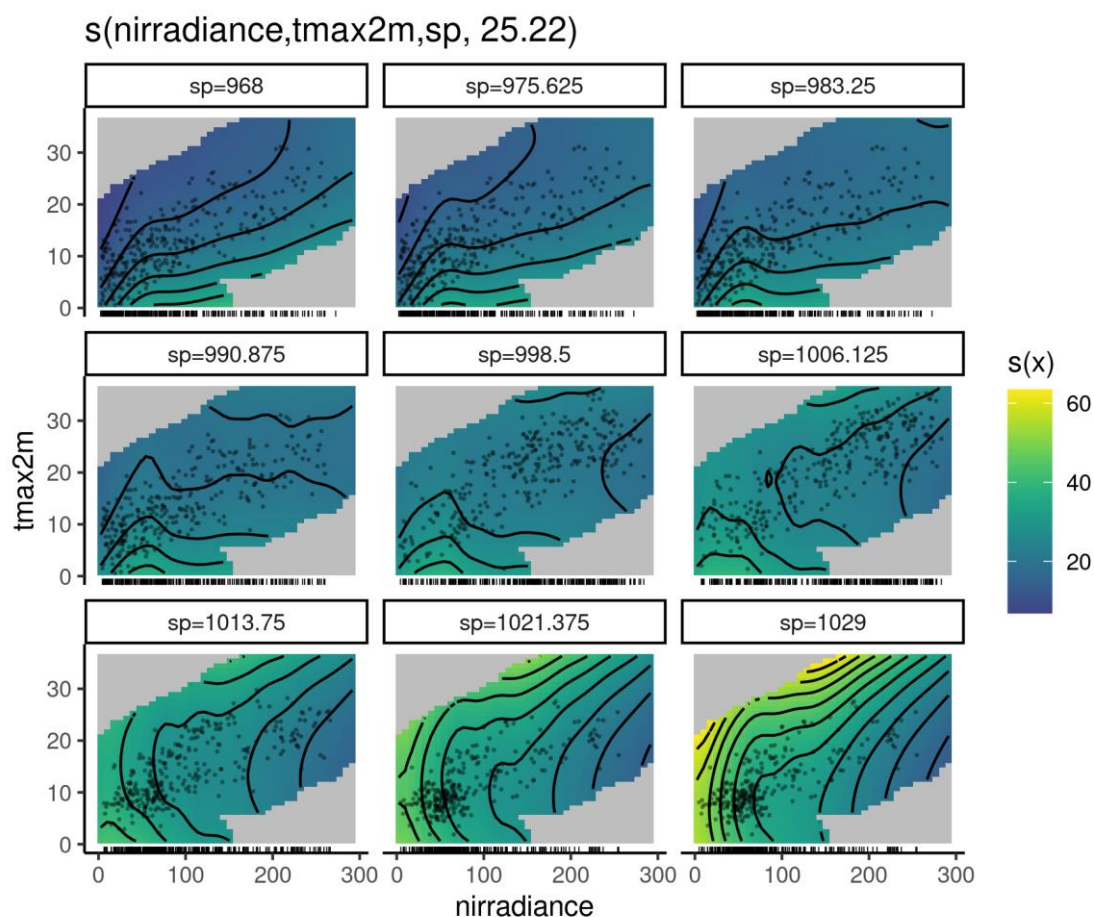

**Figure S1f.** Smooths for multiple meteorological variables interactions selected in the  $PM_{10}$  model developed for the air quality monitoring station.

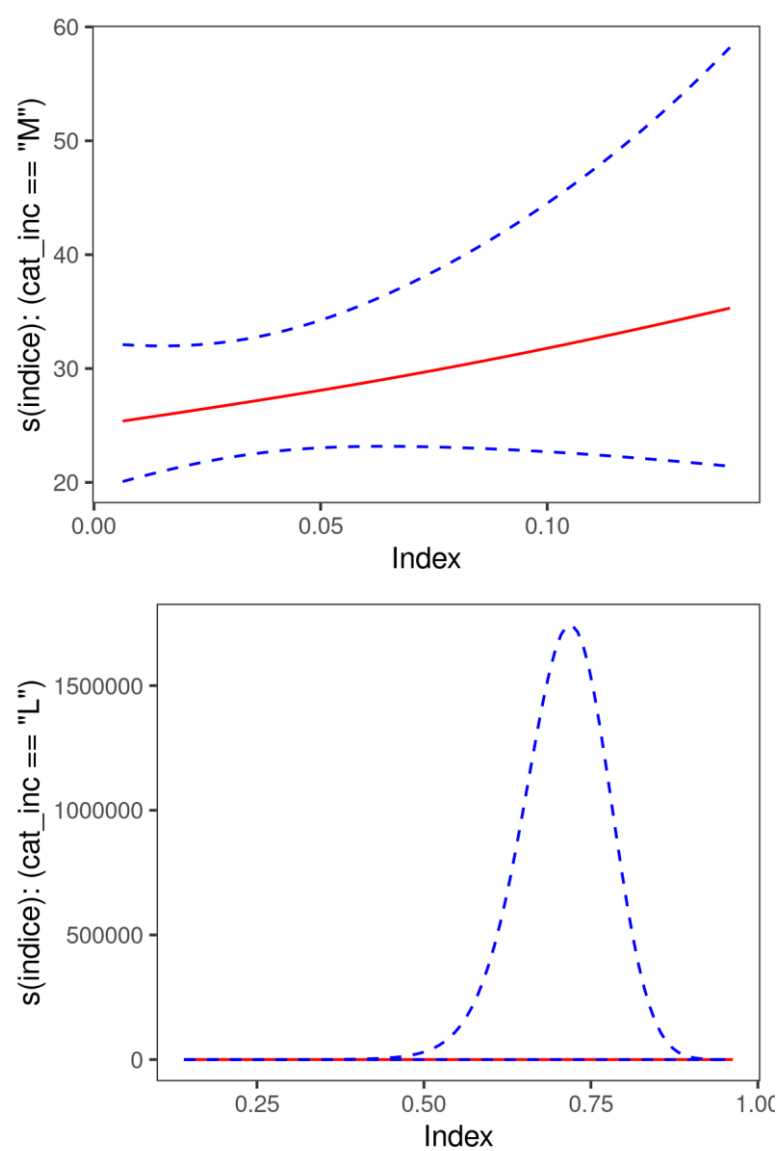

**Figure S1g.** Spline functions for categorial index variable selected in the PM<sub>10</sub> model developed for the air quality monitoring station.

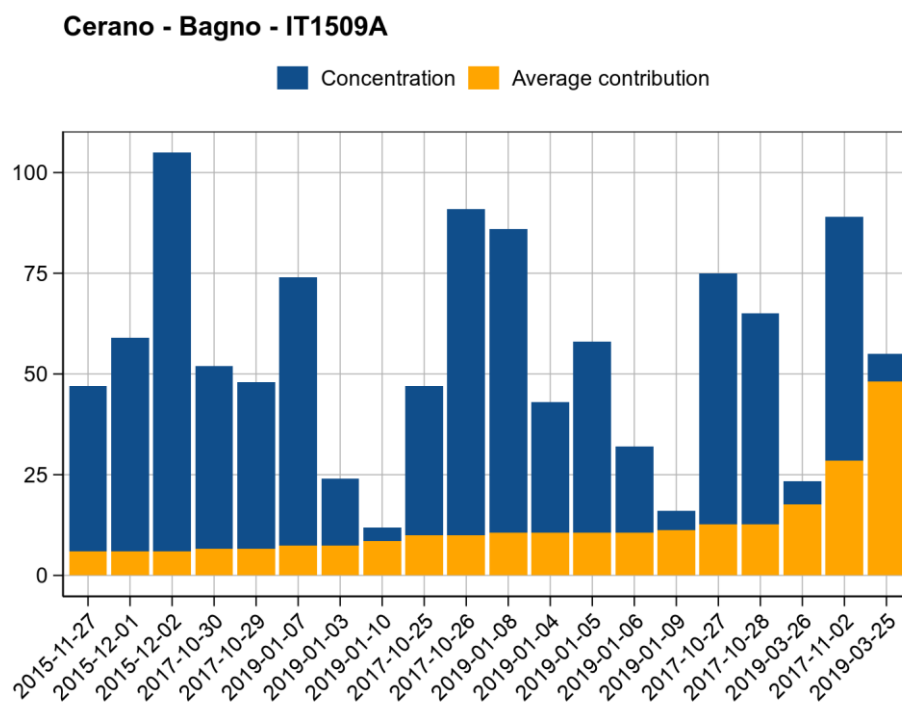

**Figure S1h.** Estimated model contribution of wildfires to daily average concentrations of PM<sub>10</sub> observed in the air quality monitoring station.

**Alba - Tanaro IT1524A**

### Alba - Tanaro - IT1524A

Fires within 75km from station

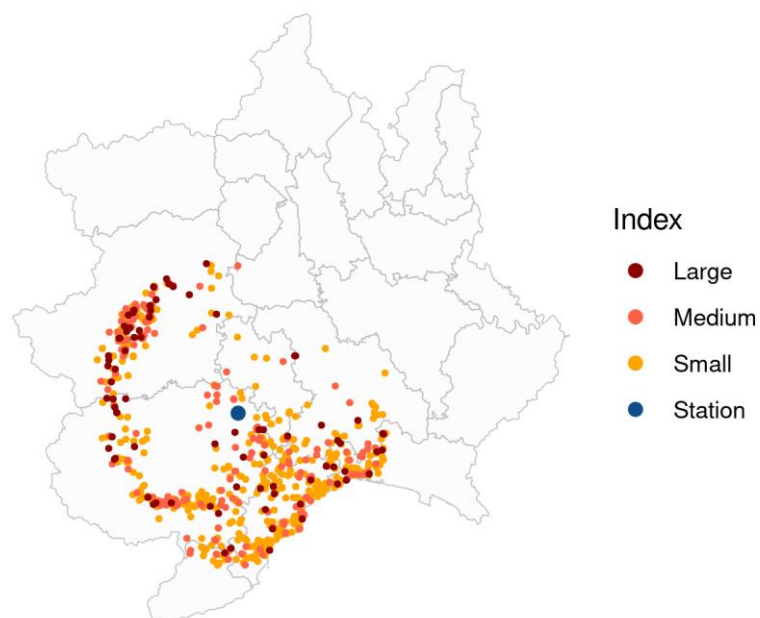

**Figure S2a.** Italy, Piedmont region: wildfires, classified by categorial index variable, within a buffer of 75 km from the air quality monitoring station.

**Table S2.** Italy, Piedmont region: descriptive statistics for wildfires, classified by categorial index variable, within a buffer of 75 km from the air quality monitoring station.

| Variable                  | n   | mean  | sd    | median |
|---------------------------|-----|-------|-------|--------|
| Wooded land area (ha)     | 888 | 6.572 | 70.98 | 0.2172 |
| Not wooded land area (ha) | 277 | 2.512 | 14.9  | 0      |
| Distance (km)             | 888 | 56.67 | 15.04 | 62.22  |
| Burned area (ha)          | 888 | 7.356 | 71.87 | 0.2618 |

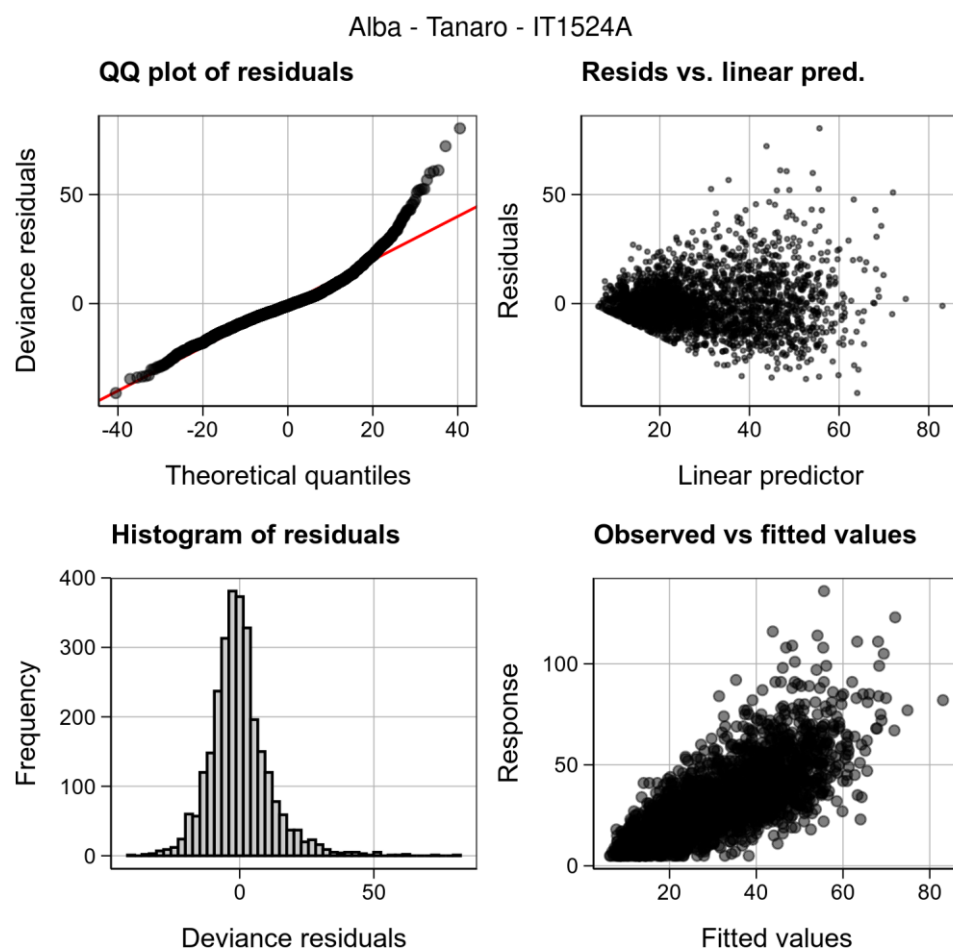

**Figure S2b.** Check of the basic assumptions: residual analysis of the PM<sub>10</sub> model developed for the air quality monitoring station.

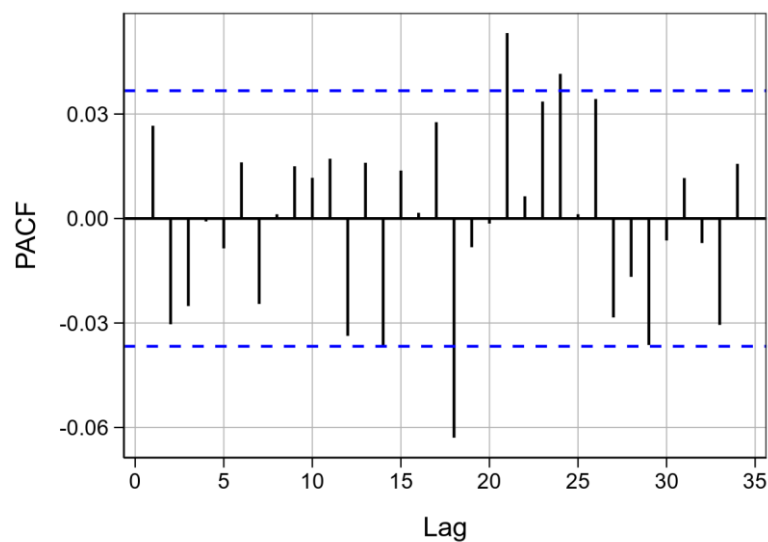

**Figure S2c.** Partial autocorrelation function (PACF) of the residuals at daily lags of the PM<sub>10</sub> model developed for the air quality monitoring station.

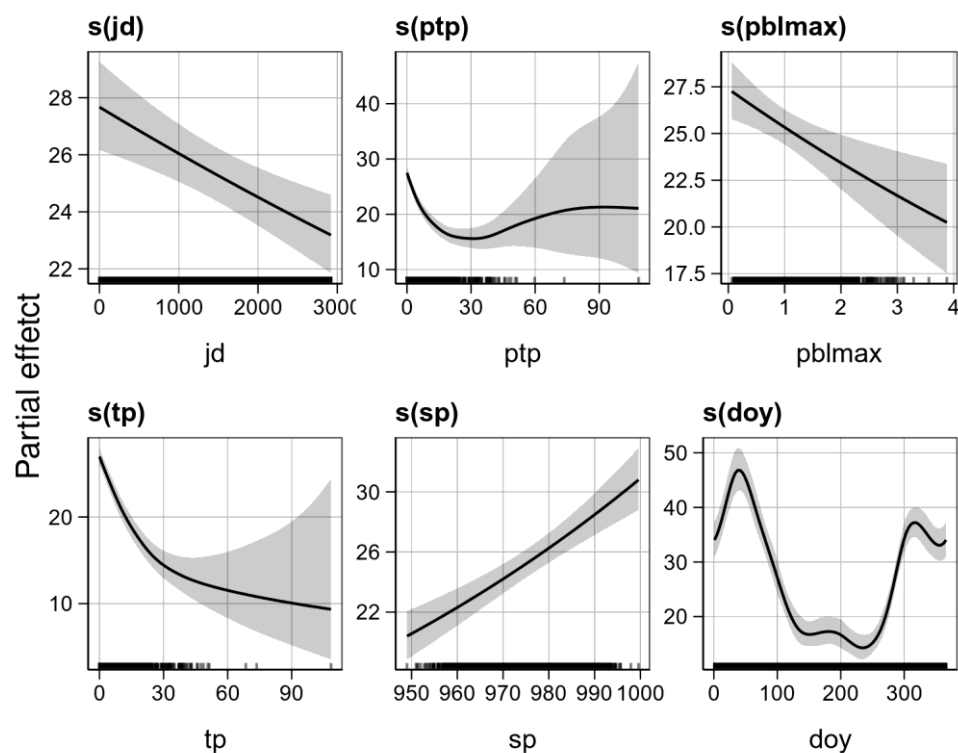

**Figure S2d.** Spline functions for single predictive variables selected in the  $PM_{10}$  model developed for the air quality monitoring station.

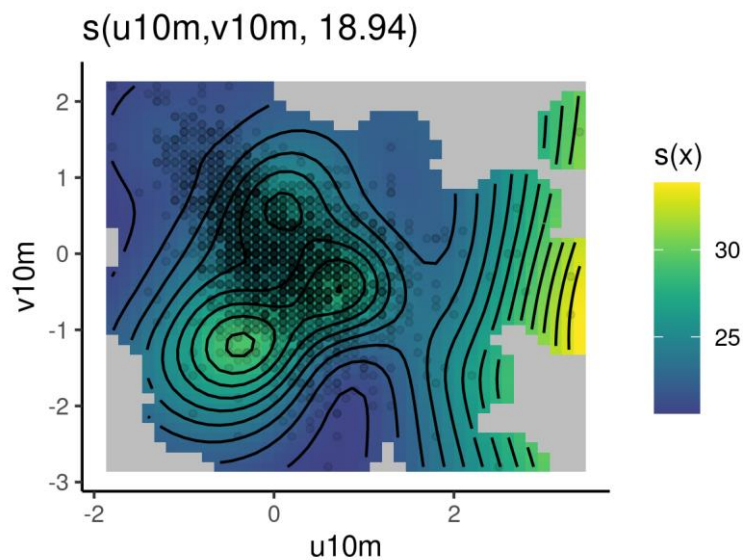

**Figure S2e.** Smooth surface for wind speed variables interaction ( $u_{10m}$ ,  $v_{10m}$ ) selected in the  $PM_{10}$  model developed for the air quality monitoring station.

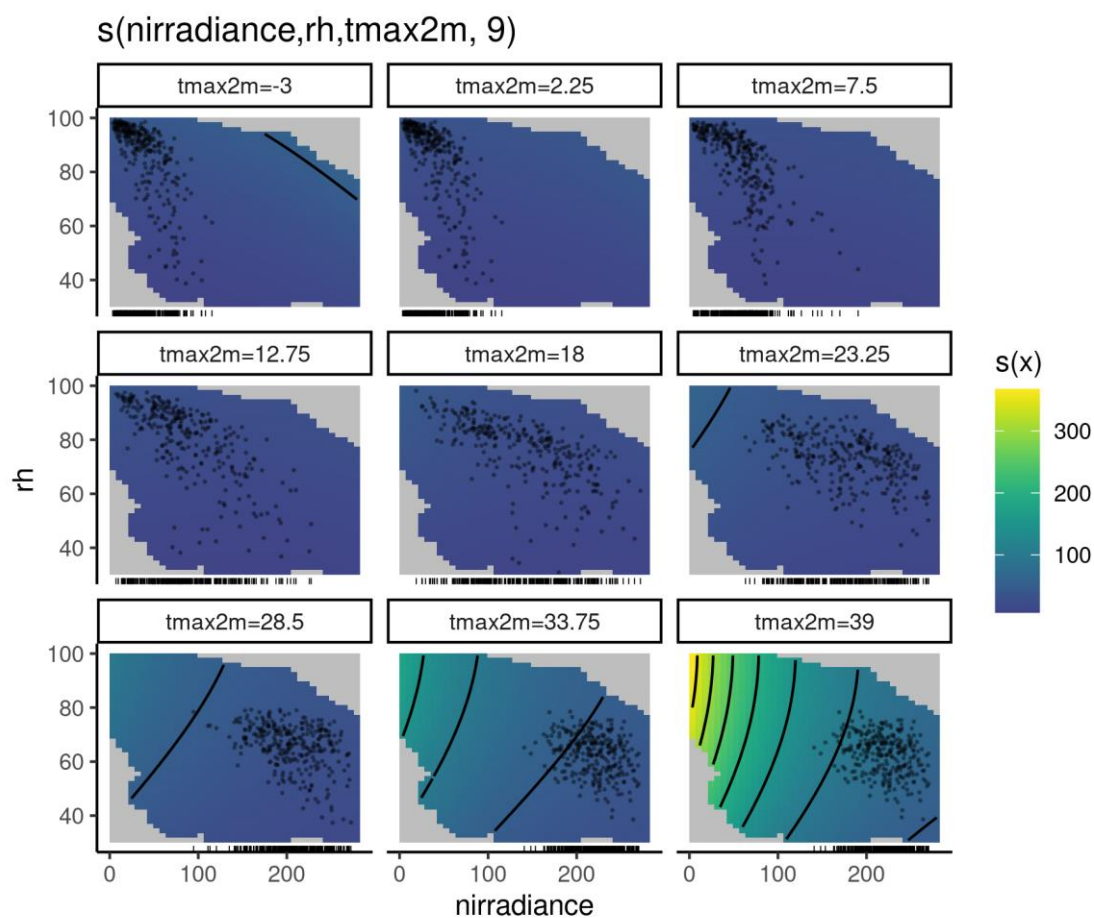

**Figure S2f.** Smooths for multiple meteorological variables interactions selected in the PM<sub>10</sub> model developed for the air quality monitoring station.

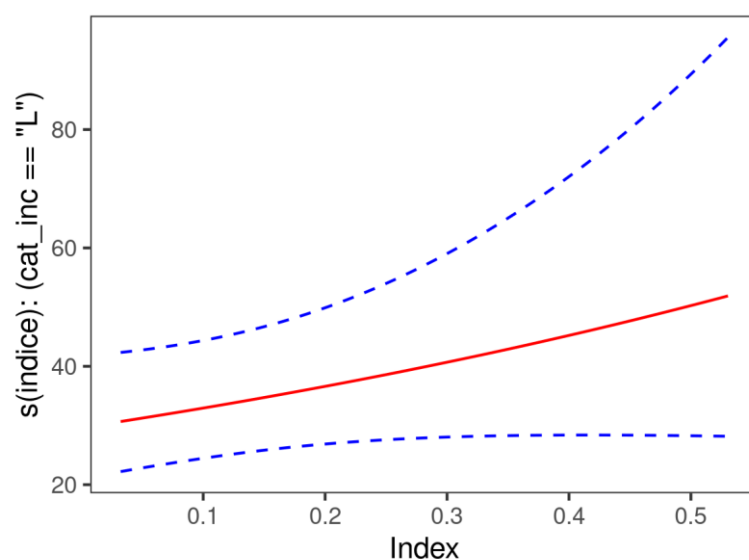

**Figure S2g.** Spline functions for categorical index variable selected in the PM<sub>10</sub> model developed for the air quality monitoring station.

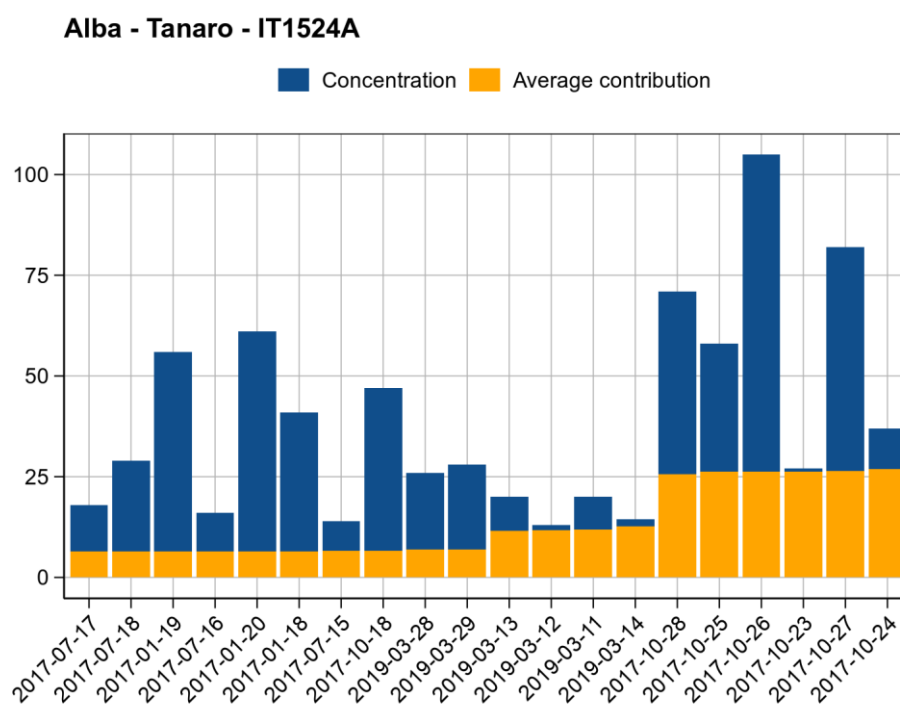

**Figure S2h.** Estimated model contribution of wildfires to daily average concentrations of PM<sub>10</sub> observed in the air quality monitoring station.

**Vercelli - Gastaldi IT1533A**

## Vercelli - Gastaldi - IT1533A

Fires within 75km from station

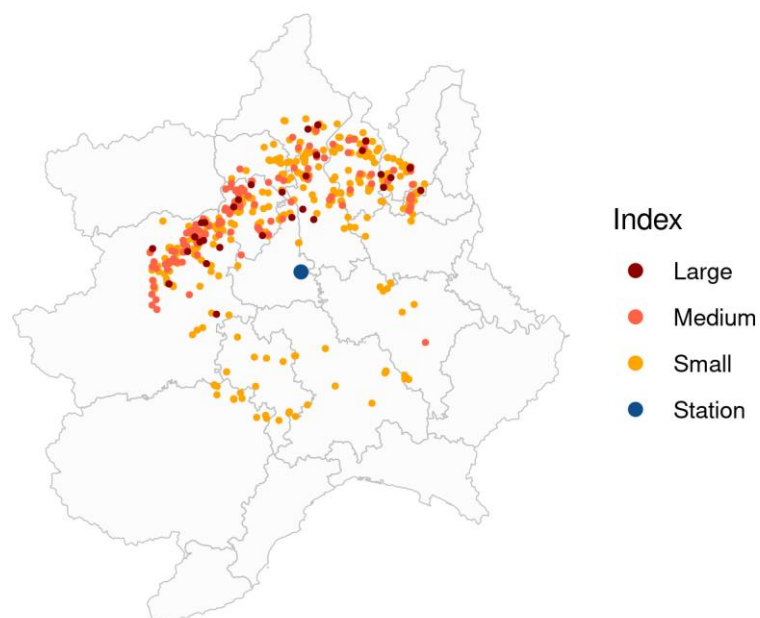

**Figure S3a.** Italy, Piedmont region: wildfires, classified by categorial index variable, within a buffer of 75 km from the air quality monitoring station.

**Table S3.** Italy, Piedmont region: descriptive statistics for wildfires, classified by categorial index variable, within a buffer of 75 km from the air quality monitoring station.

| Variable                  | n   | mean  | sd    | median |
|---------------------------|-----|-------|-------|--------|
| Wooded land area (ha)     | 559 | 14.08 | 119.4 | 0.4577 |
| Not wooded land area (ha) | 222 | 15.14 | 49.57 | 0.0872 |
| Distance (km)             | 559 | 55.05 | 12.49 | 56.41  |
| Burned area (ha)          | 559 | 20.1  | 129.8 | 0.5716 |

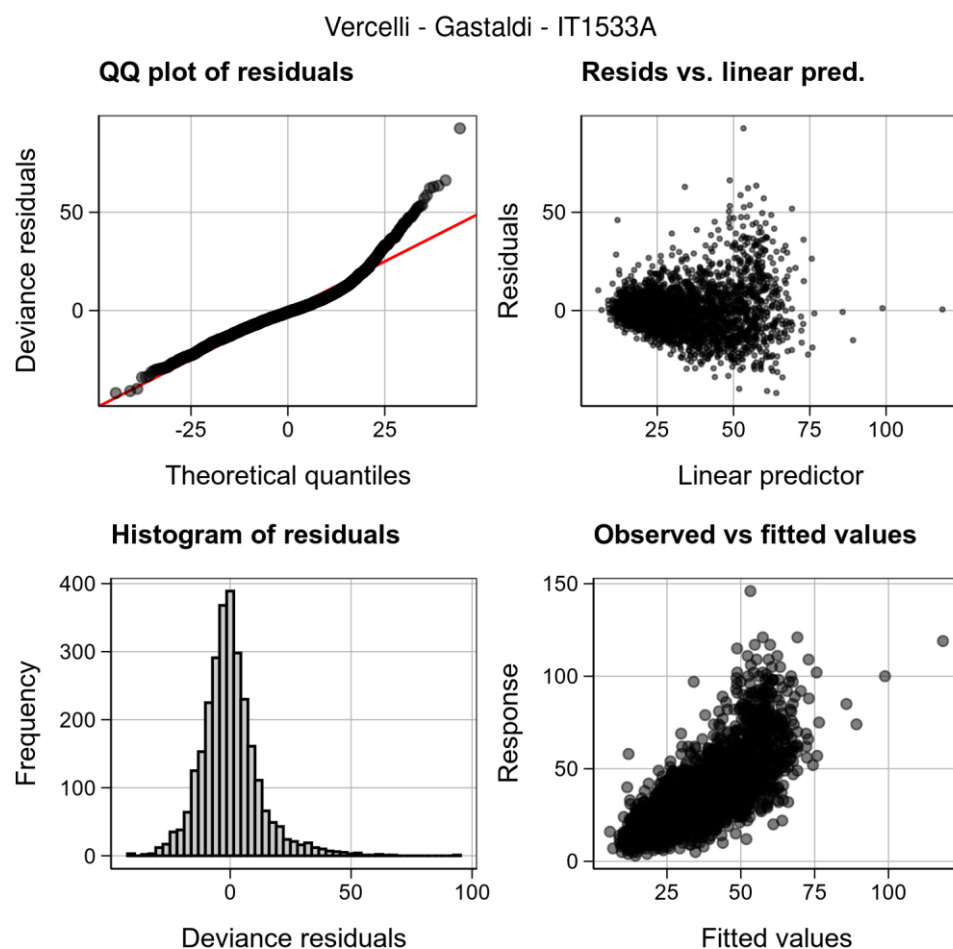

**Figure S3b.** Check of the basic assumptions: residual analysis of the PM<sub>10</sub> model developed for the air quality monitoring station.

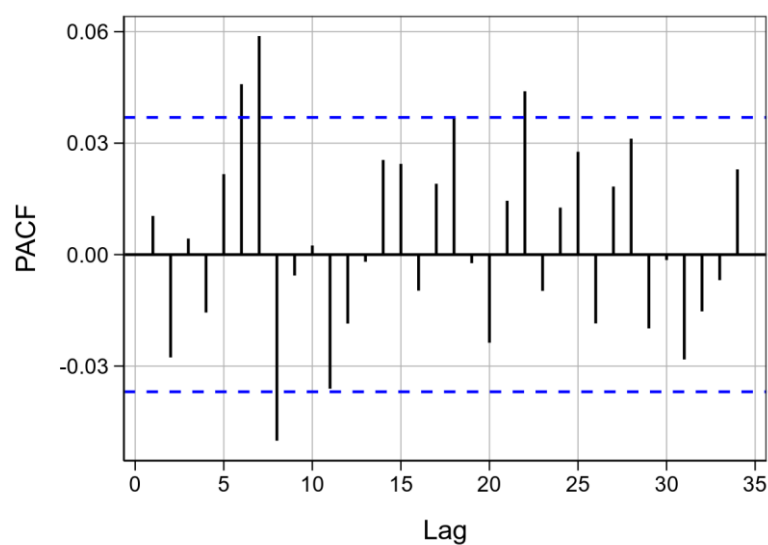

**Figure S3c.** Partial autocorrelation function (PACF) of the residuals at daily lags of the PM<sub>10</sub> model developed for the air quality monitoring station.

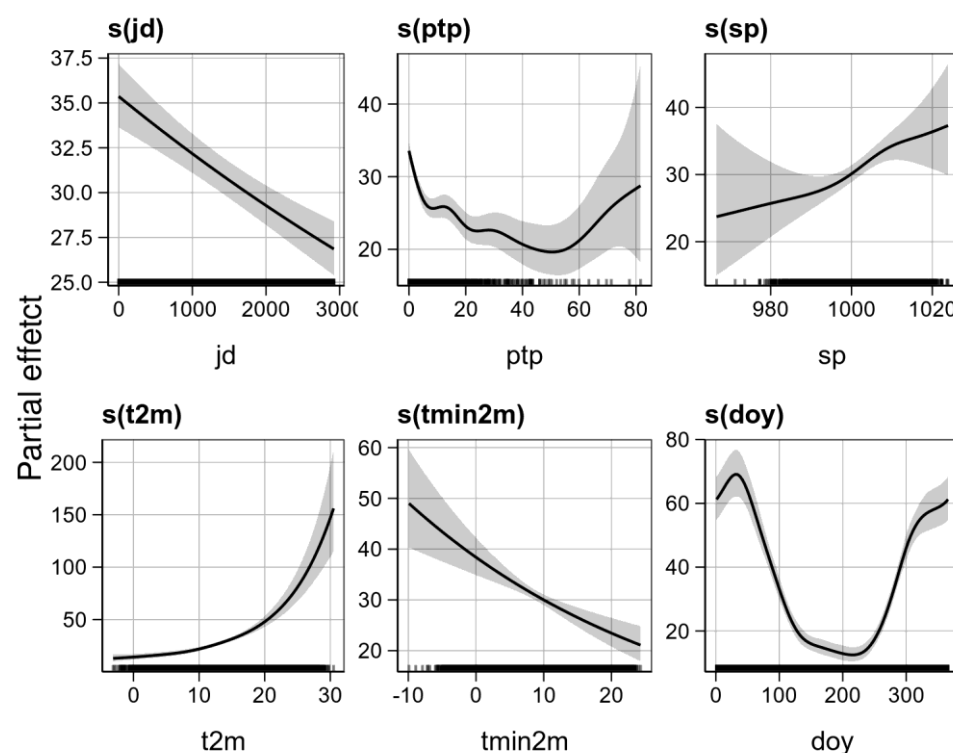

**Figure S3d.** Spline functions for single predictive variables selected in the PM<sub>10</sub> model developed for the air quality monitoring station.

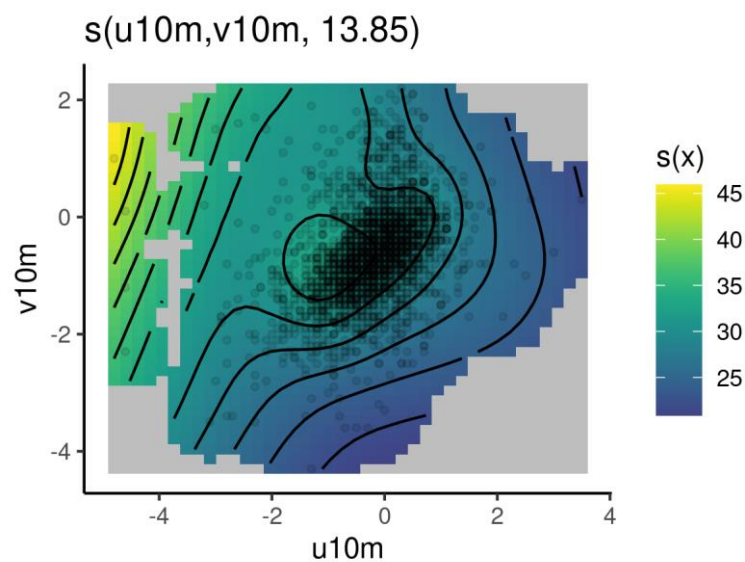

**Figure S3e.** Smooth surface for wind speed variables interaction ( $u_{10m}$ ,  $v_{10m}$ ) selected in the PM<sub>10</sub> model developed for the air quality monitoring station.

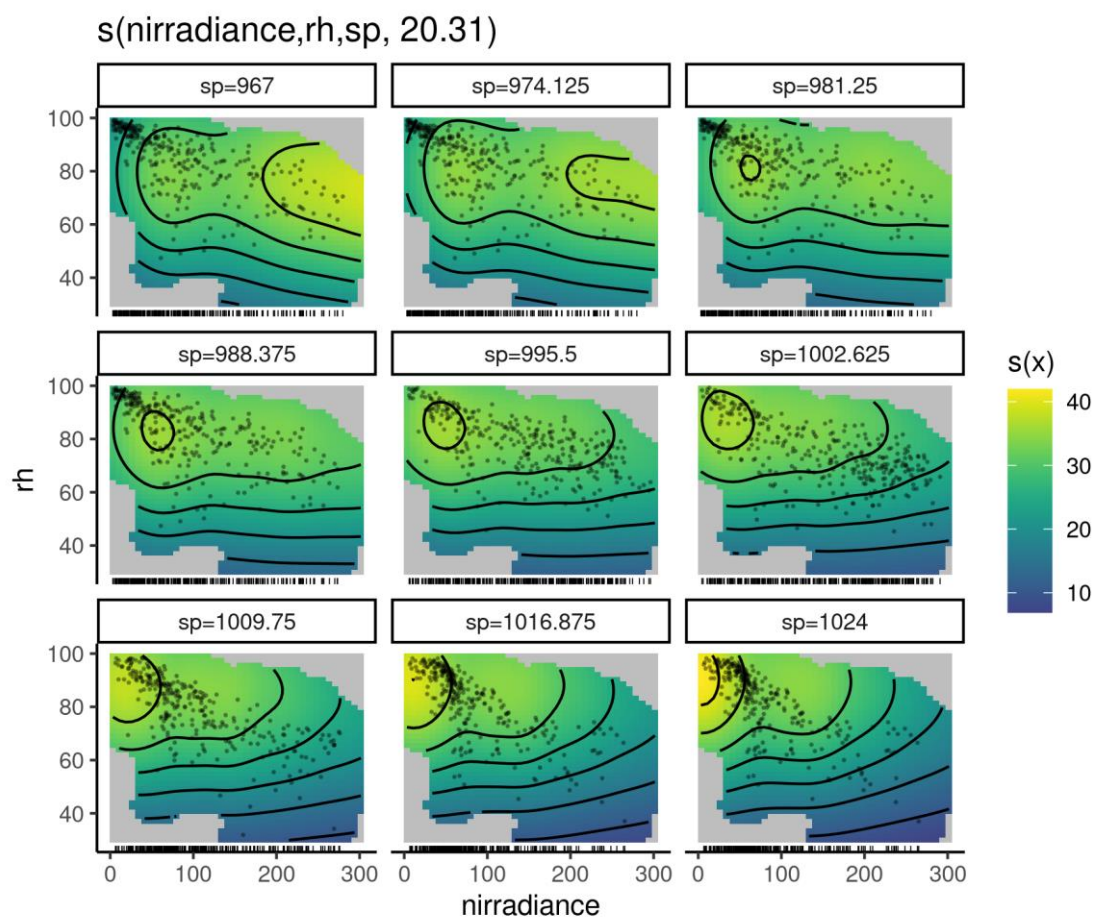

**Figure S3f.** Smooths for multiple meteorological variables interactions selected in the  $\text{PM}_{10}$  model developed for the air quality monitoring station.

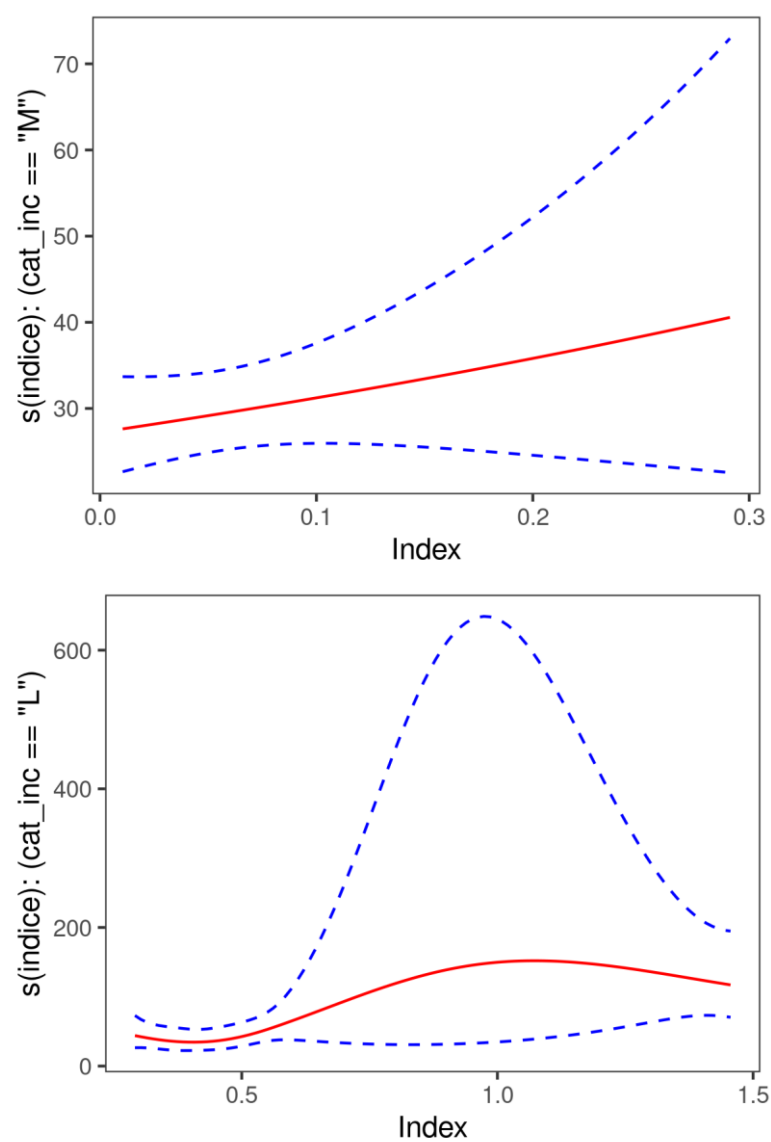

**Figure S3g.** Spline functions for categorial index variable selected in the PM<sub>10</sub> model developed for the air quality monitoring station.

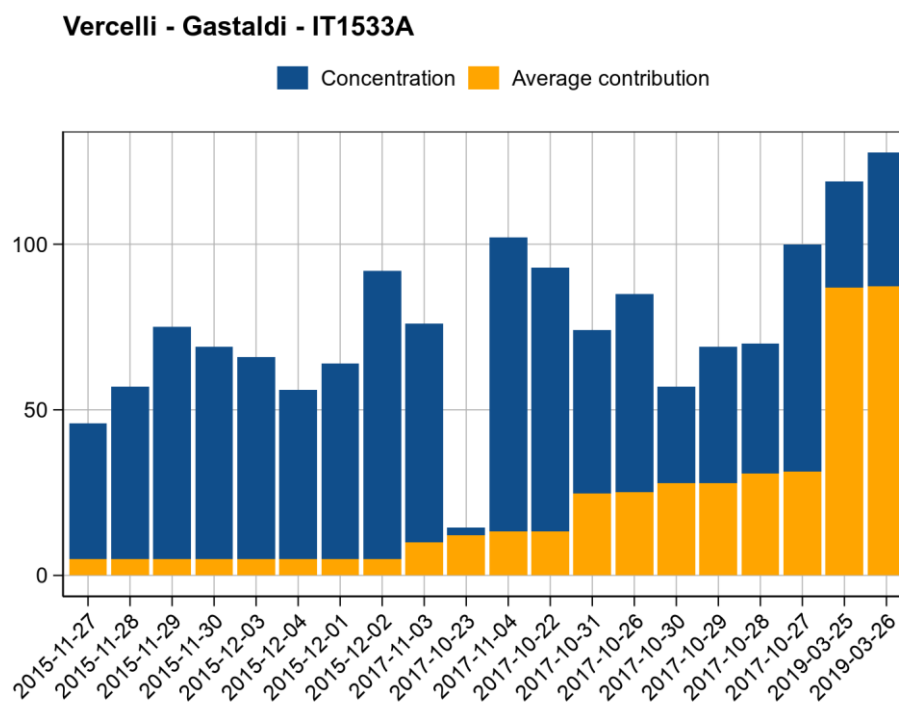

**Figure S3h.** Estimated model contribution of wildfires to daily average concentrations of PM<sub>10</sub> observed in the air quality monitoring station.

**Asti - Baussano IT1903A**

## Asti - Baussano - IT1903A

Fires within 75km from station

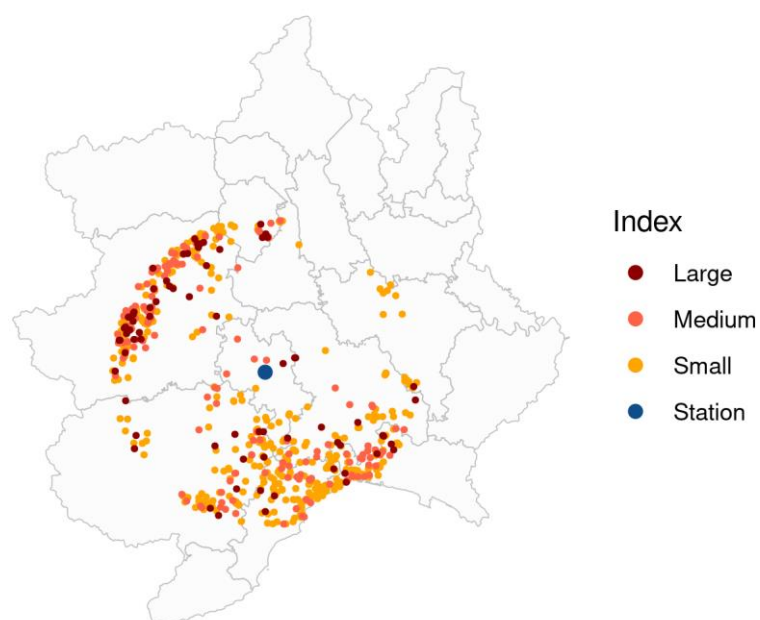

**Figure S4a.** Italy, Piedmont region: wildfires, classified by categorial index variable, within a buffer of 75 km from the air quality monitoring station.

**Table S4.** Italy, Piedmont region: descriptive statistics for wildfires, classified by categorial index variable, within a buffer of 75 km from the air quality monitoring station.

| Variable                  | n   | mean  | sd    | median |
|---------------------------|-----|-------|-------|--------|
| Wooded land area (ha)     | 813 | 6.799 | 73.22 | 0.2296 |
| Not wooded land area (ha) | 250 | 3.531 | 16.33 | 0.0105 |
| Distance (km)             | 813 | 62.12 | 12.61 | 65.91  |
| Burned area (ha)          | 813 | 7.884 | 74.35 | 0.2723 |

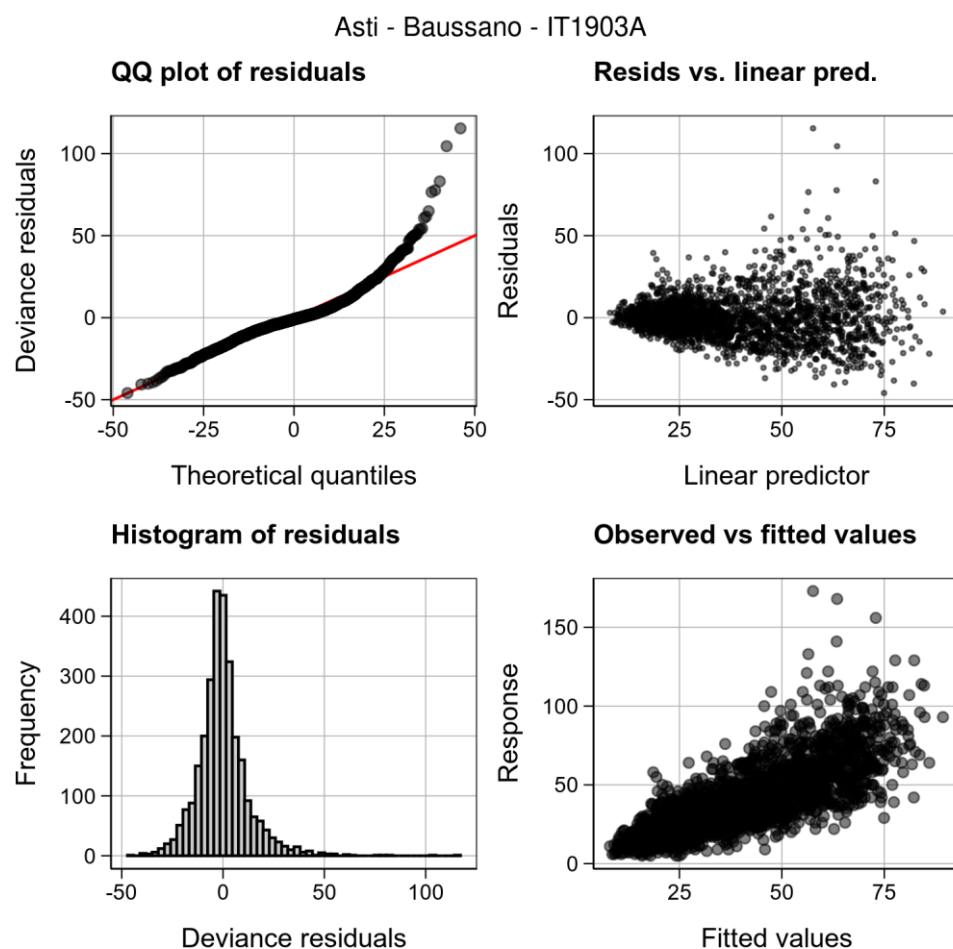

**Figure S4b.** Check of the basic assumptions: residual analysis of the PM<sub>10</sub> model developed for the air quality monitoring station.

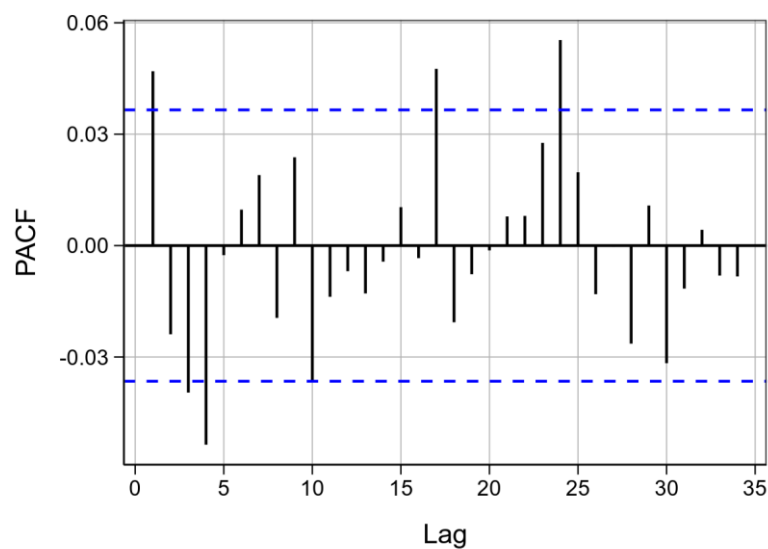

**Figure S4c.** Partial autocorrelation function (PACF) of the residuals at daily lags of the PM<sub>10</sub> model developed for the air quality monitoring station.

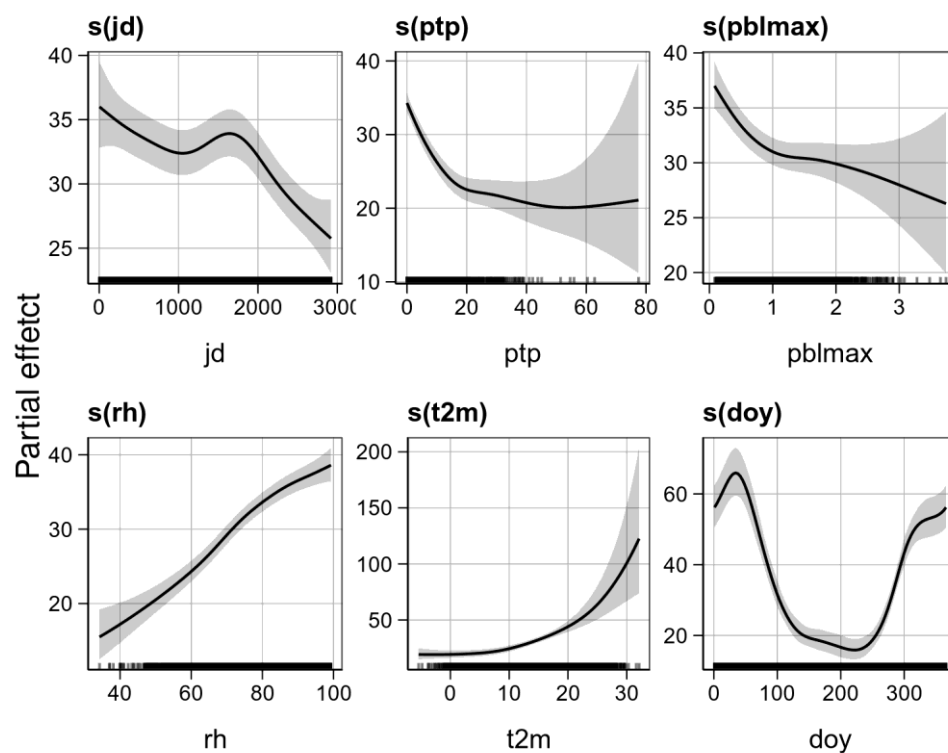

**Figure S4d.** Spline functions for single predictive variables selected in the PM<sub>10</sub> model developed for the air quality monitoring station.

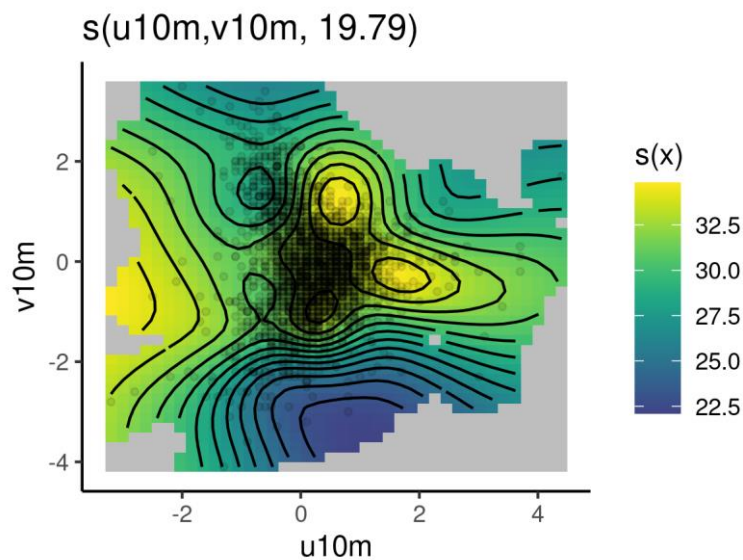

**Figure S4e.** Smooth surface for wind speed variables interaction (u10m, v10m) selected in the PM<sub>10</sub> model developed for the air quality monitoring station.

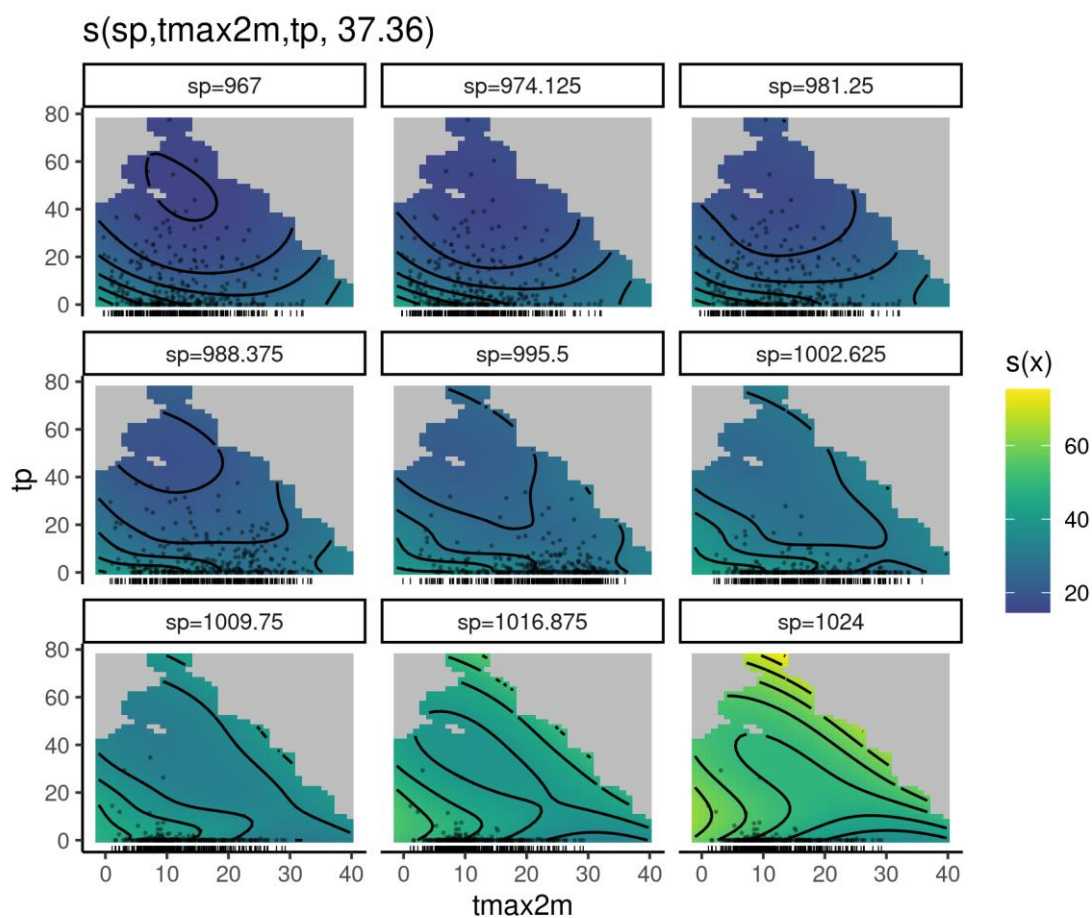

**Figure S4f.** Smooths for multiple meteorological variables interactions selected in the  $PM_{10}$  model developed for the air quality monitoring station.

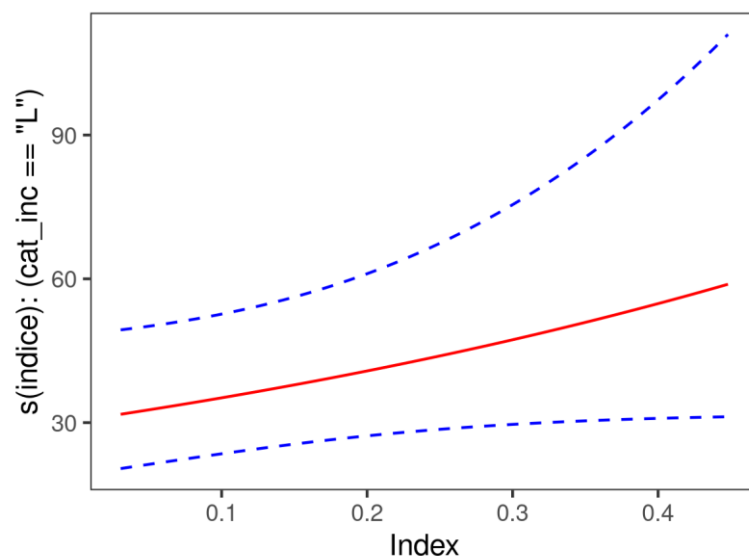

**Figure S4g.** Spline functions for categorical index variable selected in the  $PM_{10}$  model developed for the air quality monitoring station.

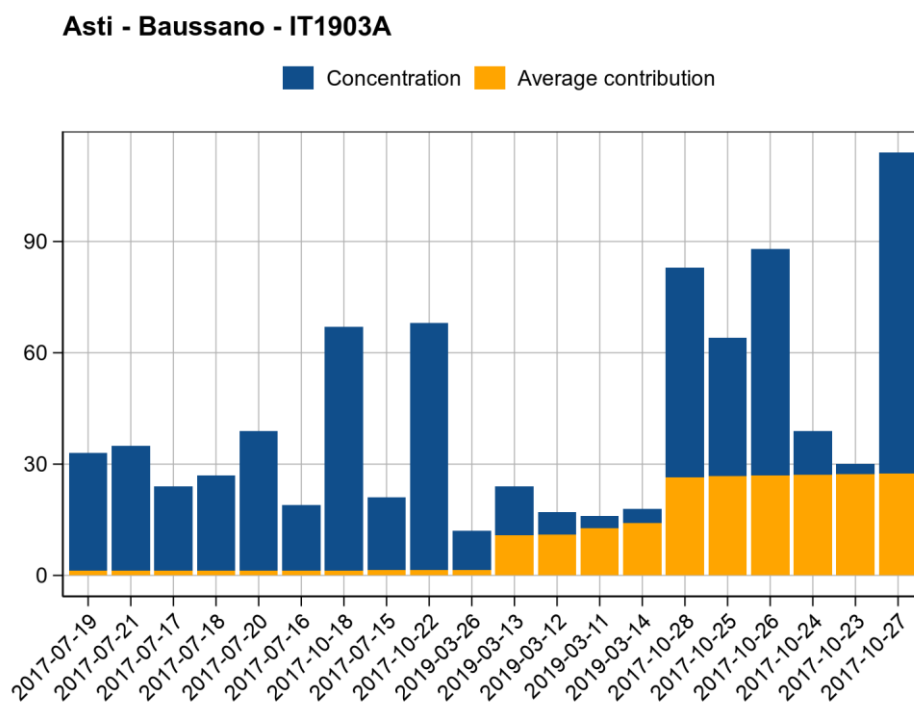

**Figure S4h.** Estimated model contribution of wildfires to daily average concentrations of PM<sub>10</sub> observed in the air quality monitoring station.

**Settimo T. - Vivaldi IT1130A**

## Settimo T. - Vivaldi - IT1130A

Fires within 75km from station

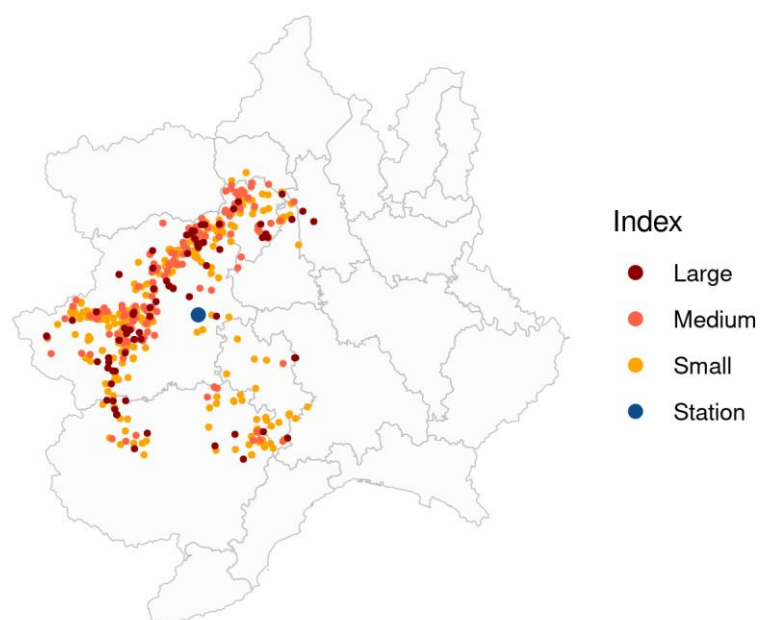

**Figure S5a.** Italy, Piedmont region: wildfires, classified by categorial index variable, within a buffer of 75 km from the air quality monitoring station.

**Table S5a.** Italy, Piedmont region: descriptive statistics for wildfires, classified by categorial index variable, within a buffer of 75 km from the air quality monitoring station.

| Variable                  | n   | mean  | sd    | median |
|---------------------------|-----|-------|-------|--------|
| Wooded land area (ha)     | 726 | 19.72 | 173.1 | 0.2877 |
| Not wooded land area (ha) | 255 | 17.91 | 73.84 | 0.2606 |
| Distance (km)             | 726 | 41.99 | 15.07 | 38.91  |
| Burned area (ha)          | 726 | 26.01 | 202.9 | 0.3848 |

Settimo T. - Vivaldi - IT1130A

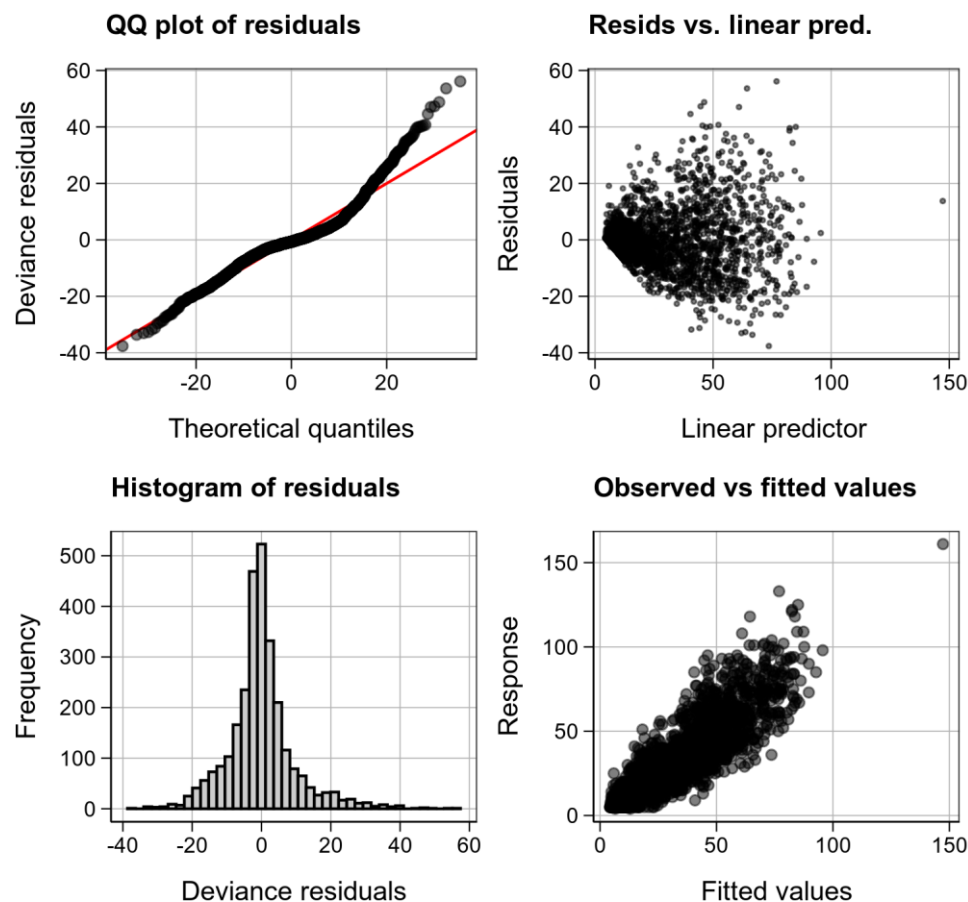

**Figure S5b.** Check of the basic assumptions: residual analysis of the PM<sub>2.5</sub> model developed for the air quality monitoring station.

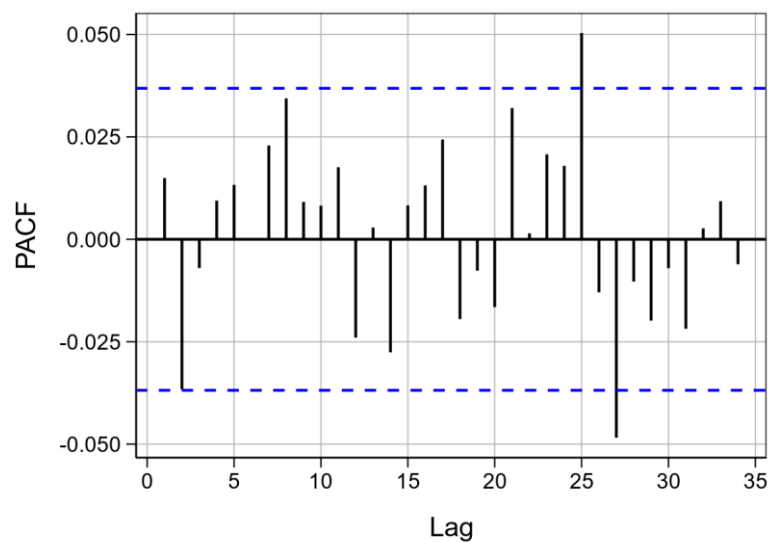

**Figure S5c.** Partial autocorrelation function (PACF) of the residuals at daily lags of the PM<sub>2.5</sub> model developed for the air quality monitoring station.

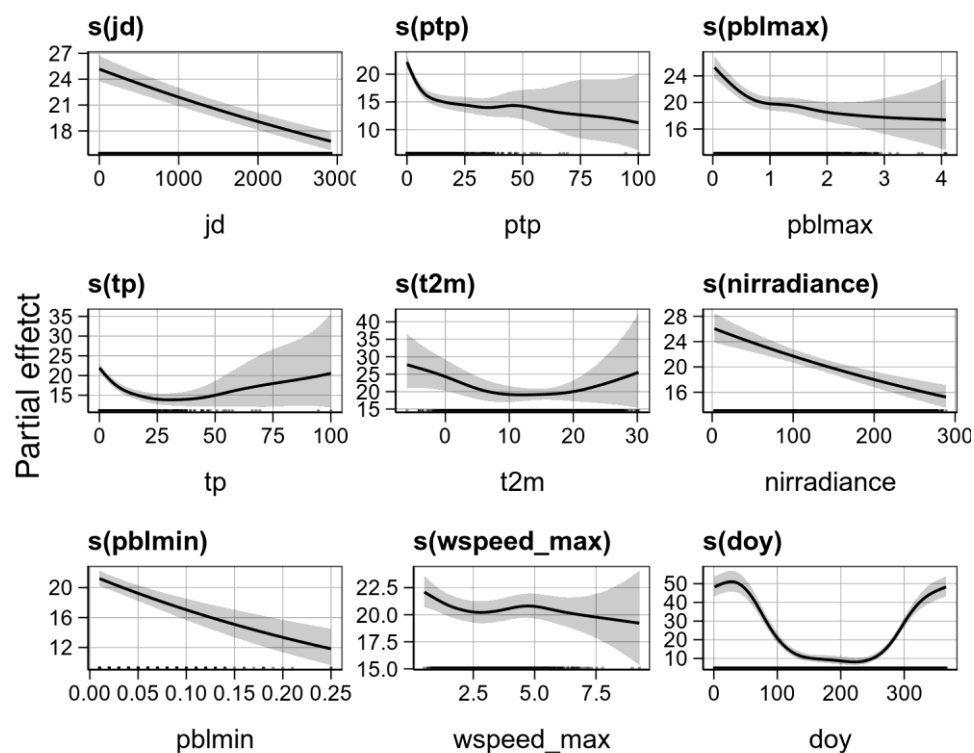

**Figure S5d.** Spline functions for single predictive variables selected in the PM<sub>2.5</sub> model developed for the air quality monitoring station.

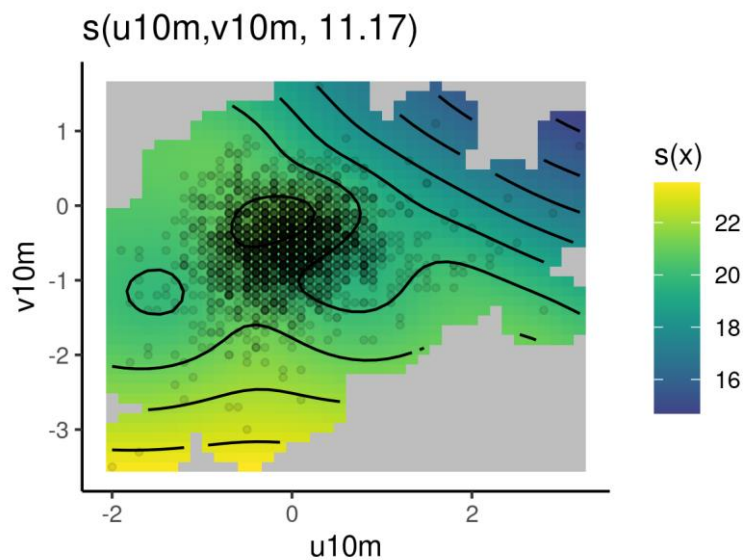

**Figure S5e.** Smooth surface for wind speed variables interaction (u10m, v10m) selected in the PM<sub>2.5</sub> model developed for the air quality monitoring station.

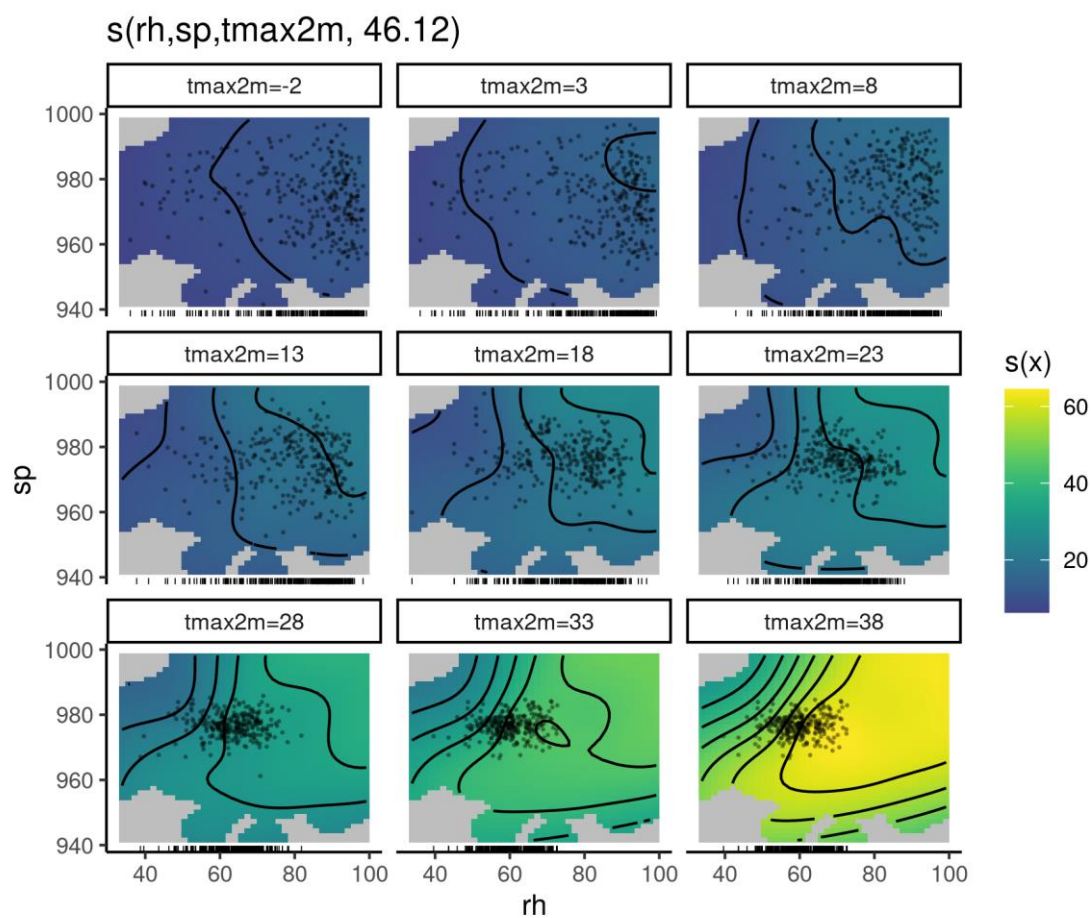

**Figure S5f.** Smooths for multiple meteorological variables interactions selected in the  $PM_{2.5}$  model developed for the air quality monitoring station.

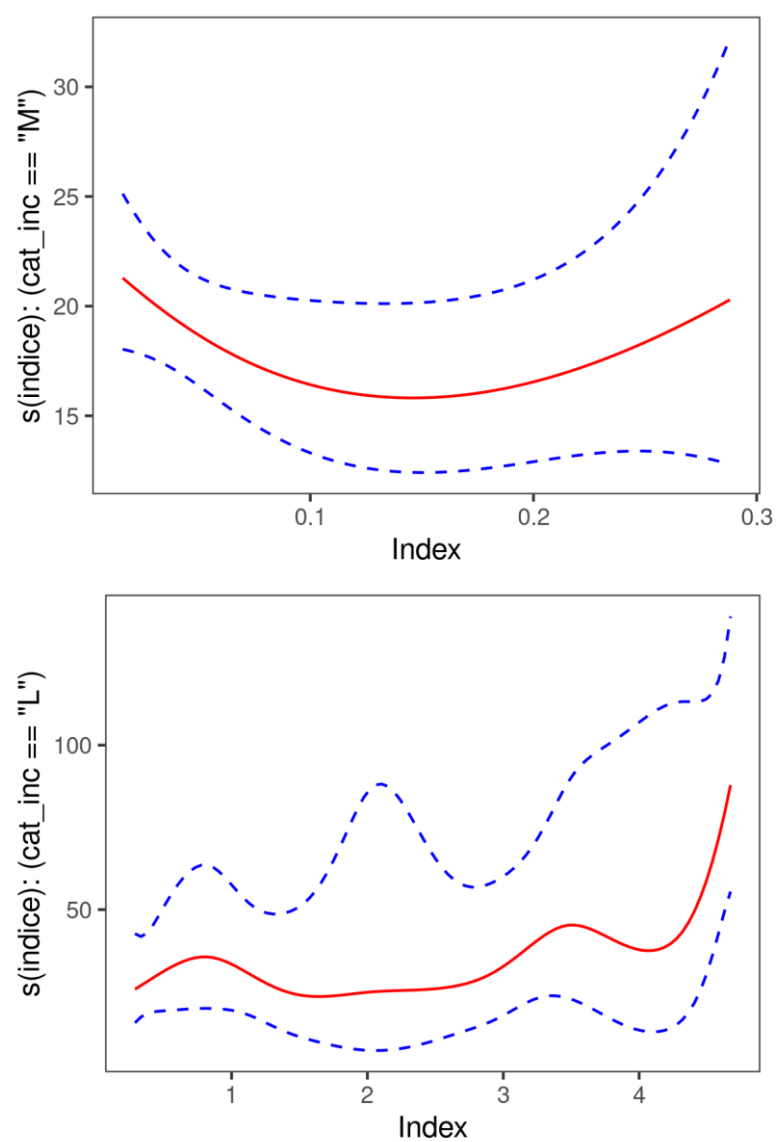

**Figure S5g.** Spline functions for categorial index variable selected in the PM<sub>2.5</sub> model developed for the air quality monitoring station.

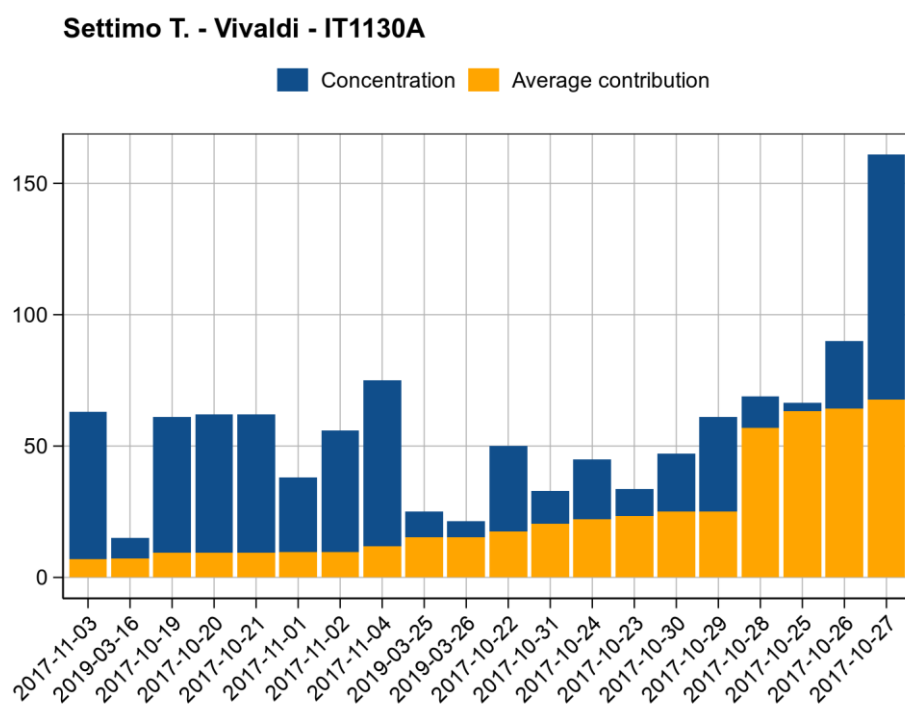

**Figure S5h.** Estimated model contribution of wildfires to daily average concentrations of PM<sub>2.5</sub> observed in the air quality monitoring station.

**Borgosesia - Tonella IT1532A**

## Borgosesia - Tonella - IT1532A

Fires within 75km from station

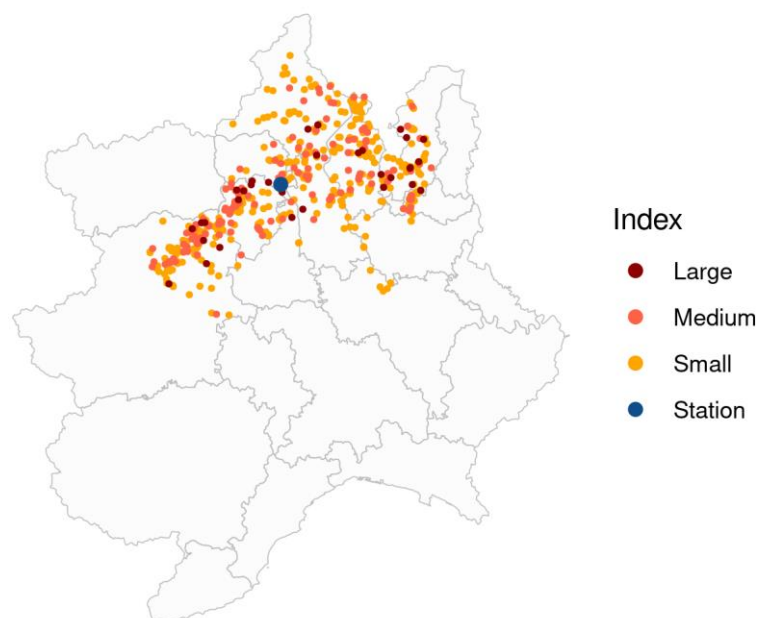

**Figure S6a.** Italy, Piedmont region: wildfires, classified by categorial index variable, within a buffer of 75 km from the air quality monitoring station.

**Table S6.** Italy, Piedmont region: descriptive statistics for wildfires, classified by categorial index variable, within a buffer of 75 km from the air quality monitoring station.

| Variable                  | n   | mean  | sd    | median |
|---------------------------|-----|-------|-------|--------|
| Wooded land area (ha)     | 594 | 14.51 | 116.7 | 0.437  |
| Not wooded land area (ha) | 245 | 14.97 | 48.4  | 0.1096 |
| Distance (km)             | 594 | 43.31 | 18.88 | 45.91  |
| Burned area (ha)          | 594 | 20.68 | 127.3 | 0.5721 |

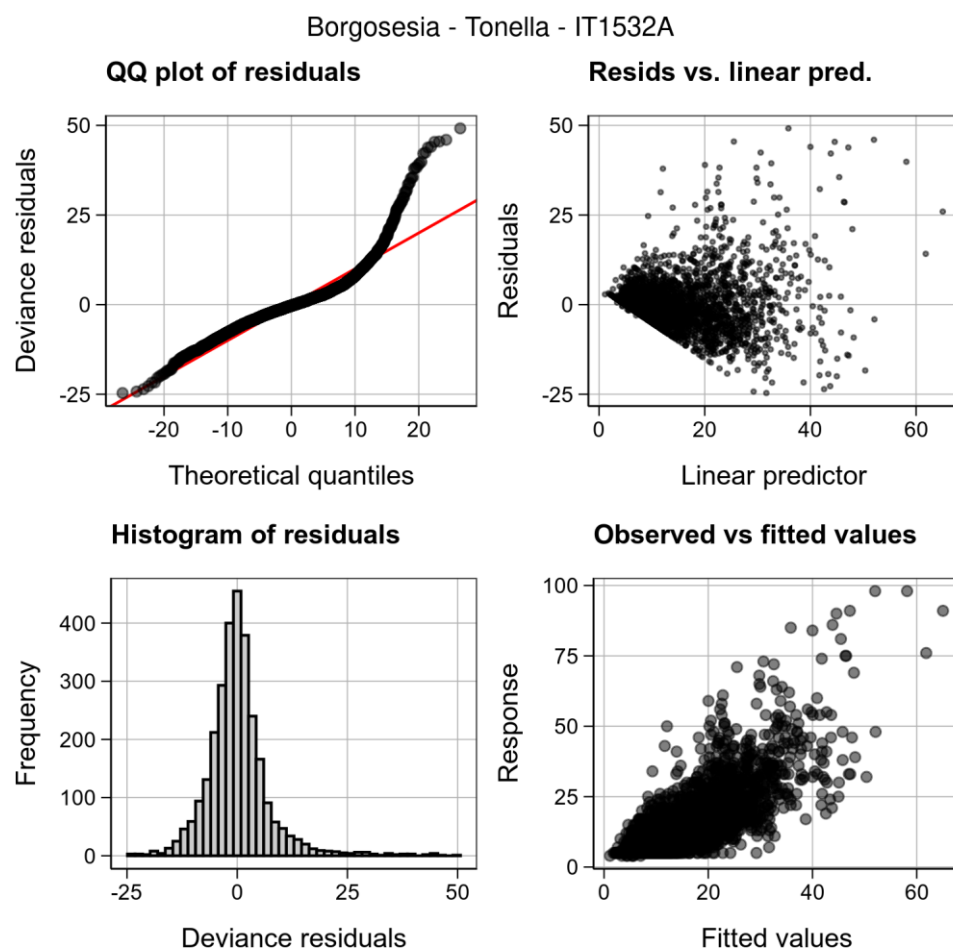

**Figure S6b.** Check of the basic assumptions: residual analysis of the  $PM_{2.5}$  model developed for the air quality monitoring station.

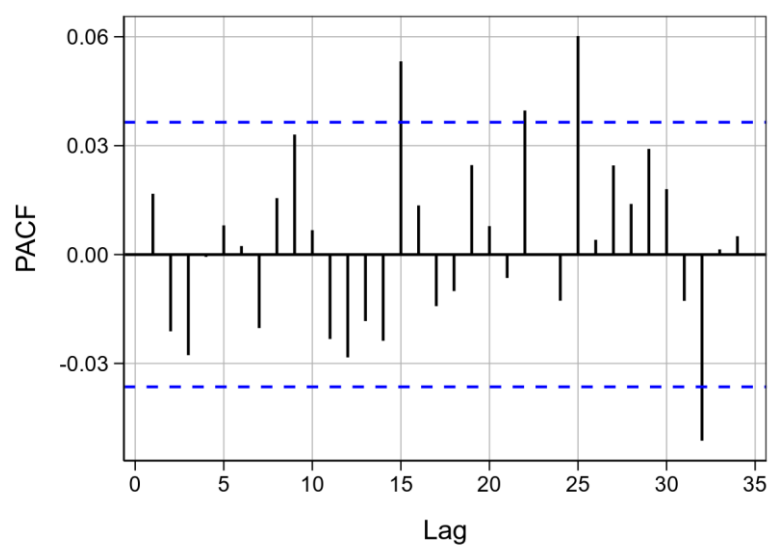

**Figure S6c.** Partial autocorrelation function (PACF) of the residuals at daily lags of the  $PM_{2.5}$  model developed for the air quality monitoring station.

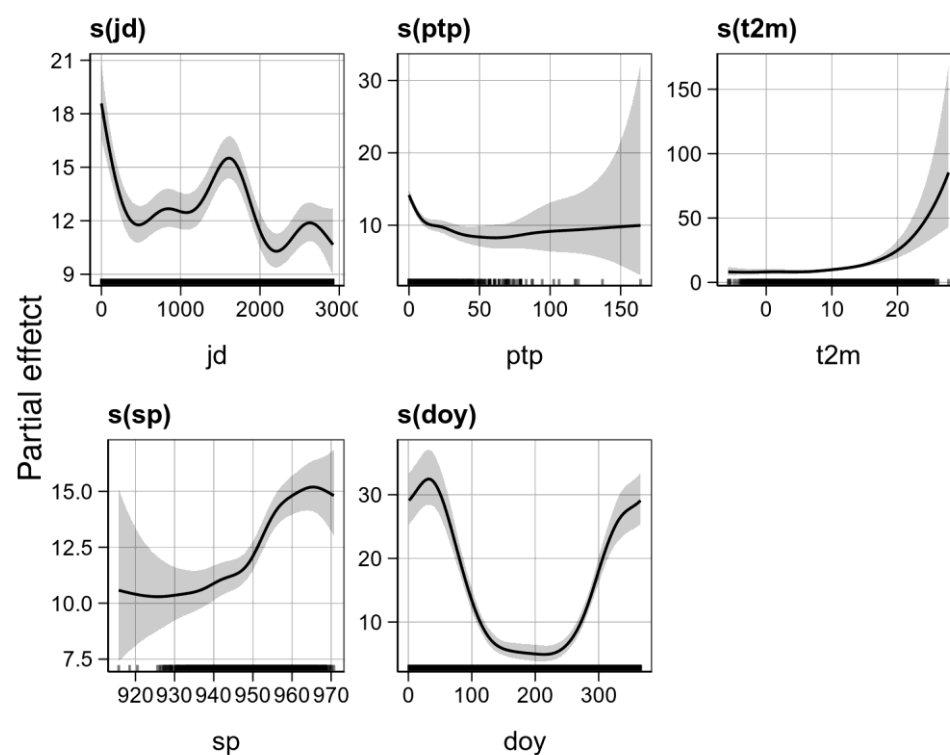

**Figure S6d.** Spline functions for single predictive variables selected in the PM<sub>2.5</sub> model developed for the air quality monitoring station.

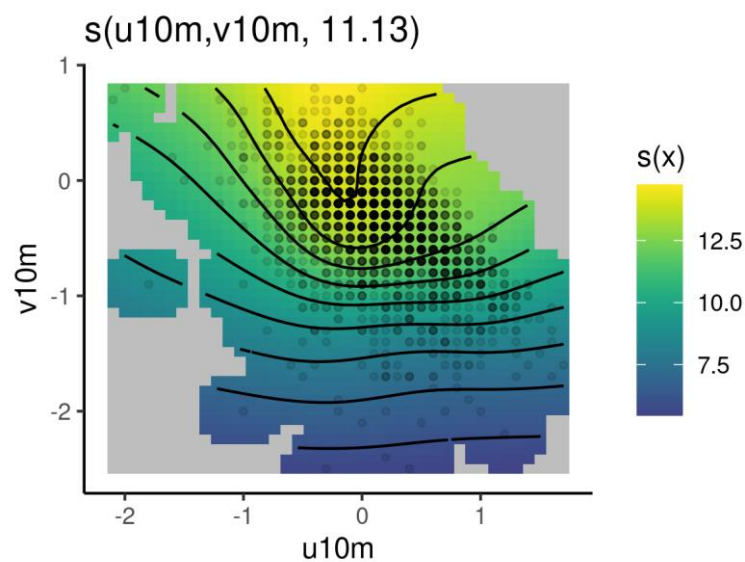

**Figure S6e.** Smooth surface for wind speed variables interaction (u10m, v10m) selected in the PM<sub>2.5</sub> model developed for the air quality monitoring station.

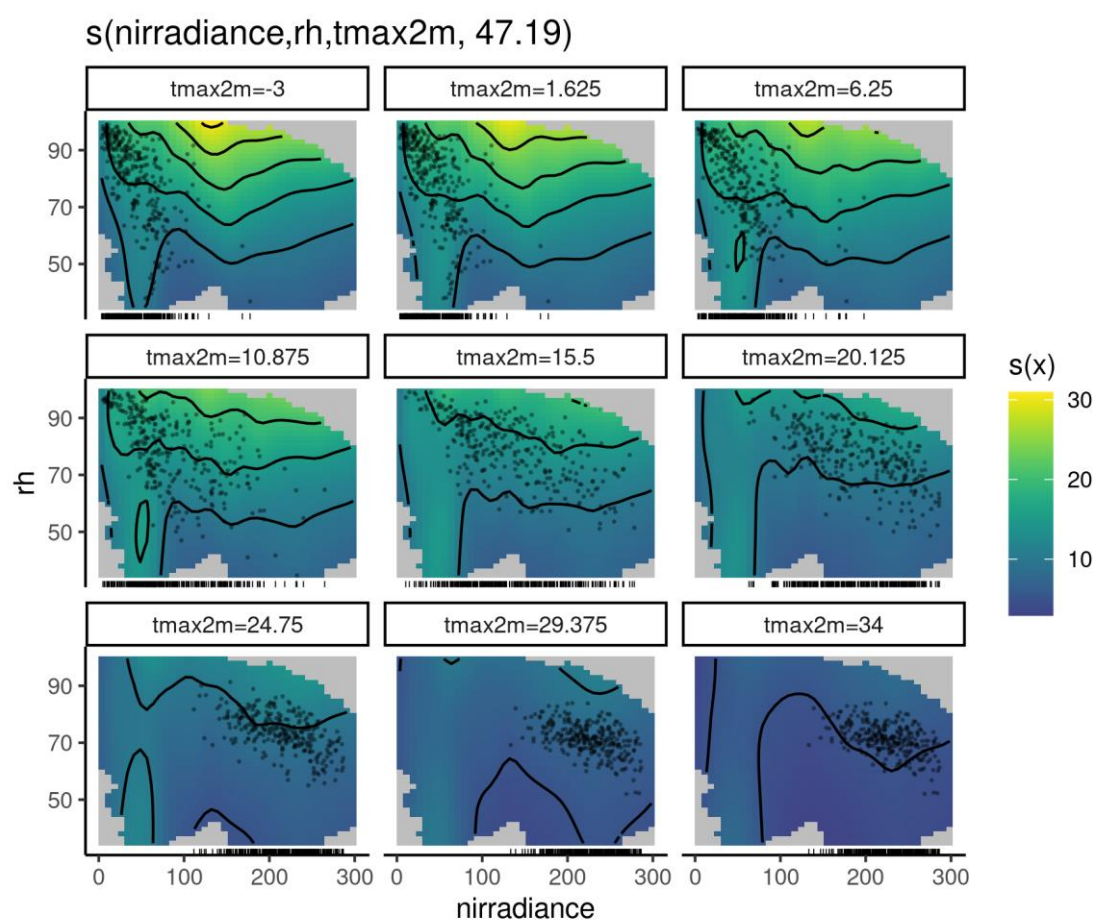

**Figure S6f.** Smooths for multiple meteorological variables interactions selected in the PM<sub>2.5</sub> model developed for the air quality monitoring station.

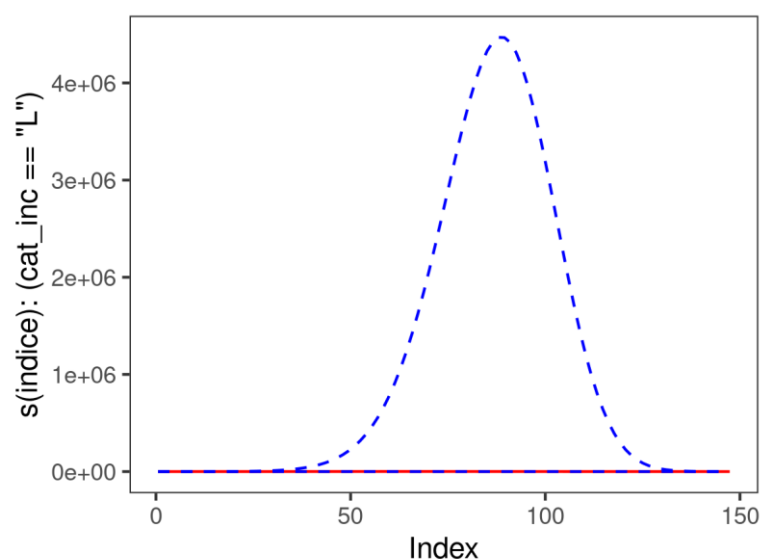

**Figure S6g.** Spline functions for categorical index variable selected in the PM<sub>2.5</sub> model developed for the air quality monitoring station.

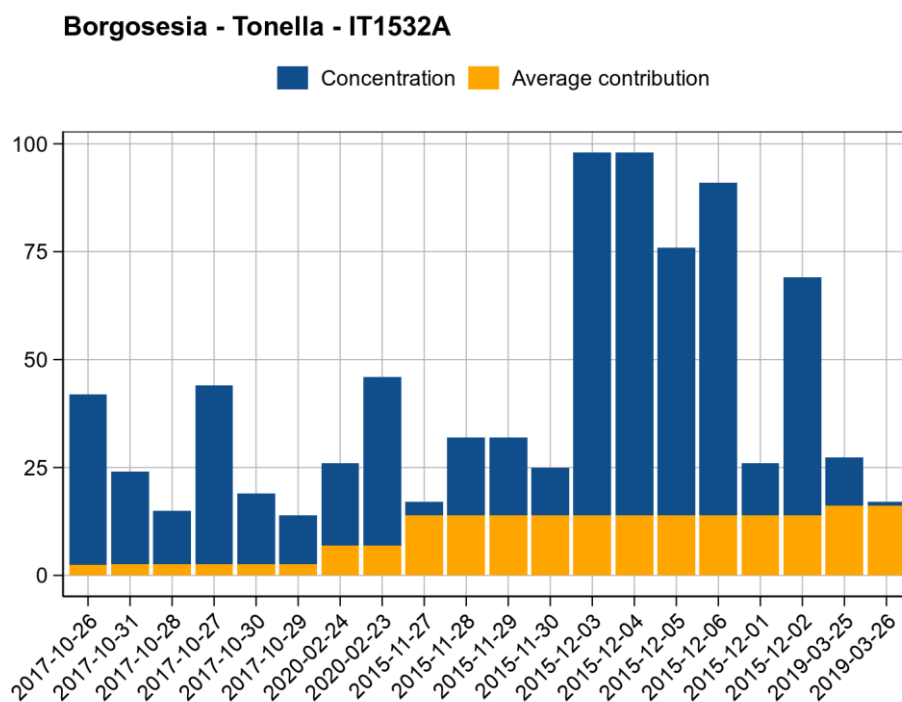

**Figure S6h.** Estimated model contribution of wildfires to daily average concentrations of PM<sub>2.5</sub> observed in the air quality monitoring station.

**Ivrea - Liberazione IT1788A**

## Ivrea - Liberazione - IT1788A

Fires within 75km from station

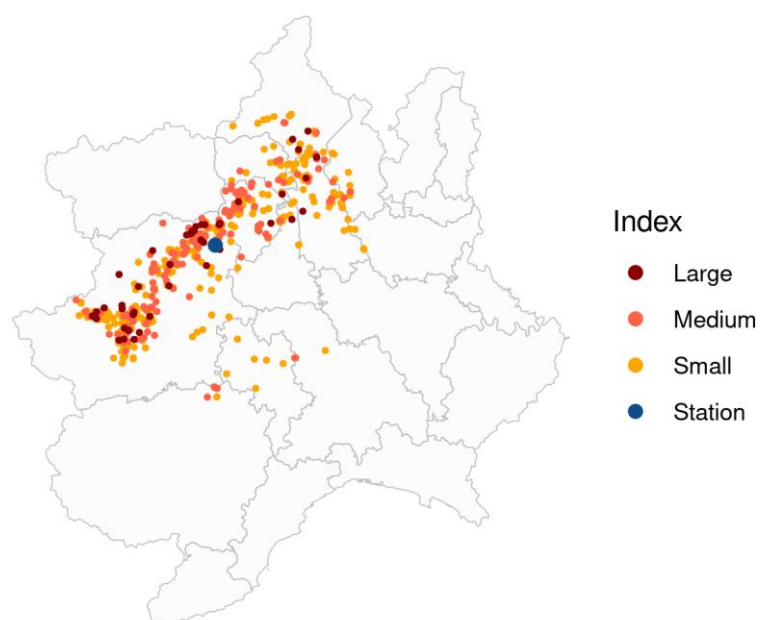

**Figure S7a.** Italy, Piedmont region: wildfires, classified by categorial index variable, within a buffer of 75 km from the air quality monitoring station.

**Table S7.** Italy, Piedmont region: descriptive statistics for wildfires, classified by categorial index variable, within a buffer of 75 km from the air quality monitoring station.

| Variable                  | n   | mean  | sd    | median |
|---------------------------|-----|-------|-------|--------|
| Wooded land area (ha)     | 732 | 18.8  | 171.4 | 0.315  |
| Not wooded land area (ha) | 258 | 17.28 | 72.84 | 0.1712 |
| Distance (km)             | 732 | 45.18 | 20.02 | 51     |
| Burned area (ha)          | 732 | 24.89 | 200.6 | 0.3808 |

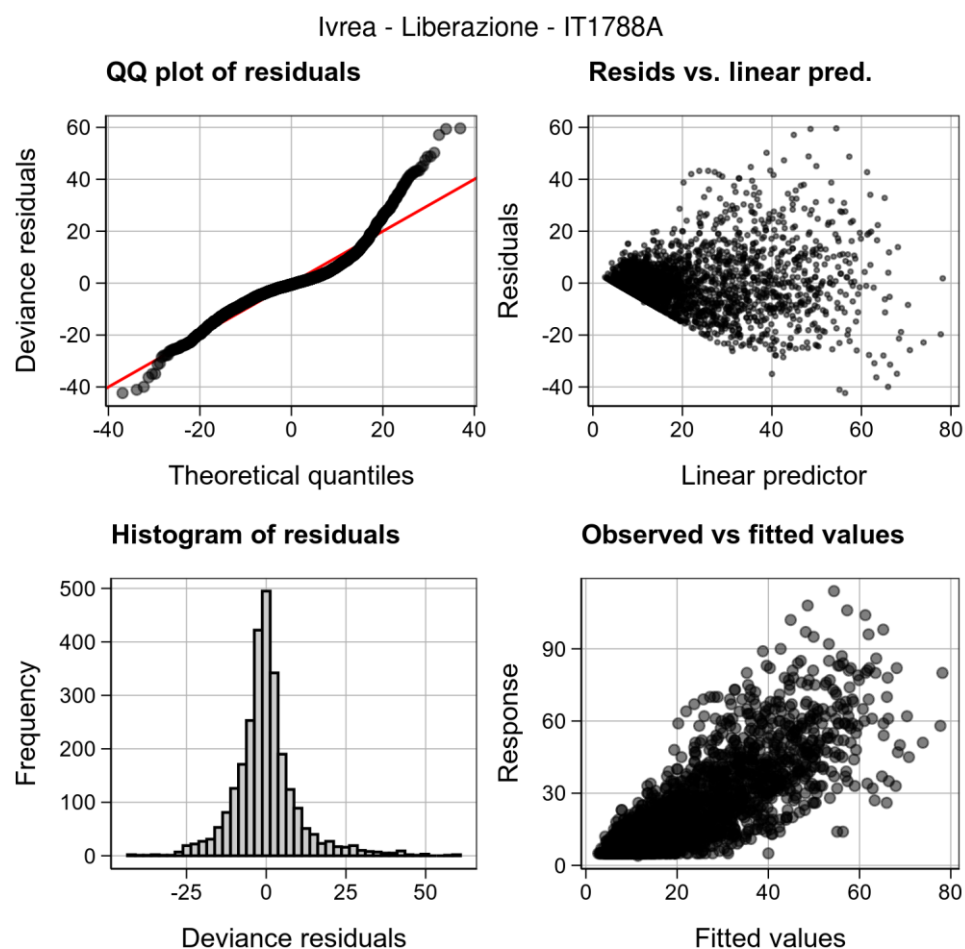

**Figure S7b.** Check of the basic assumptions: residual analysis of the PM<sub>2.5</sub> model developed for the air quality monitoring station.

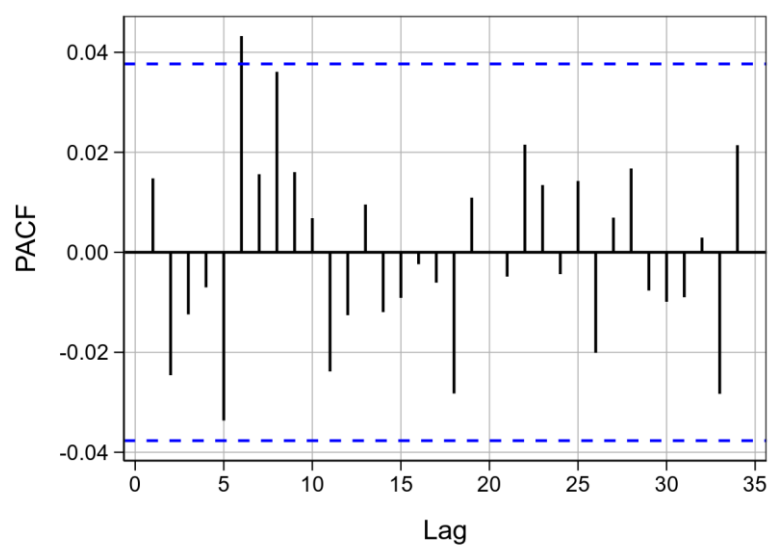

**Figure S7c.** Partial autocorrelation function (PACF) of the residuals at daily lags of the PM<sub>2.5</sub> model developed for the air quality monitoring station.

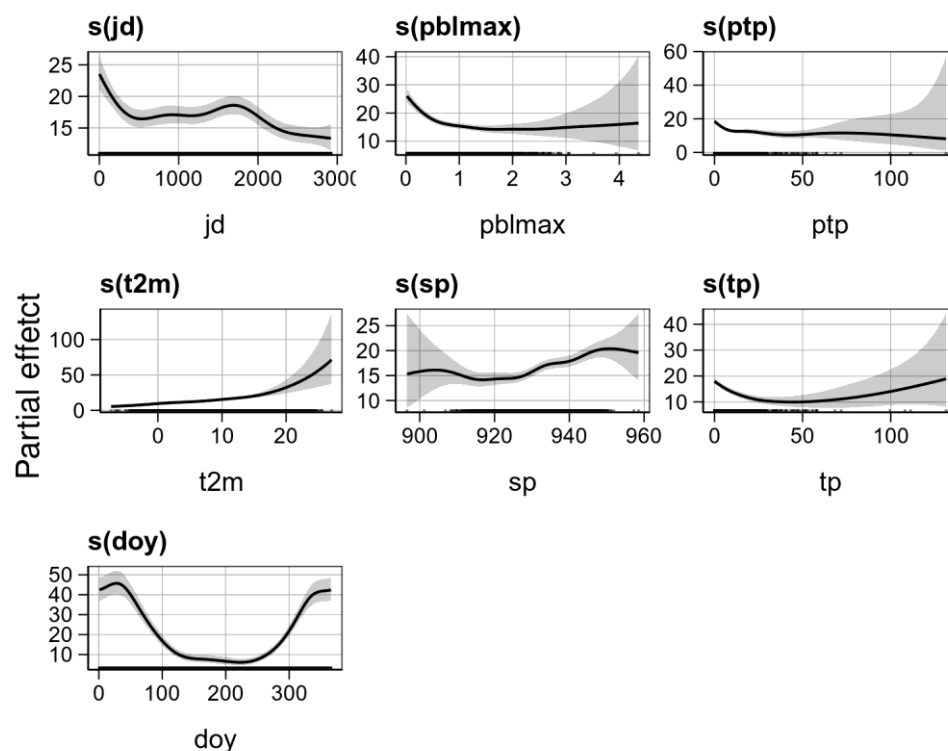

**Figure S7d.** Spline functions for single predictive variables selected in the  $PM_{2.5}$  model developed for the air quality monitoring station.

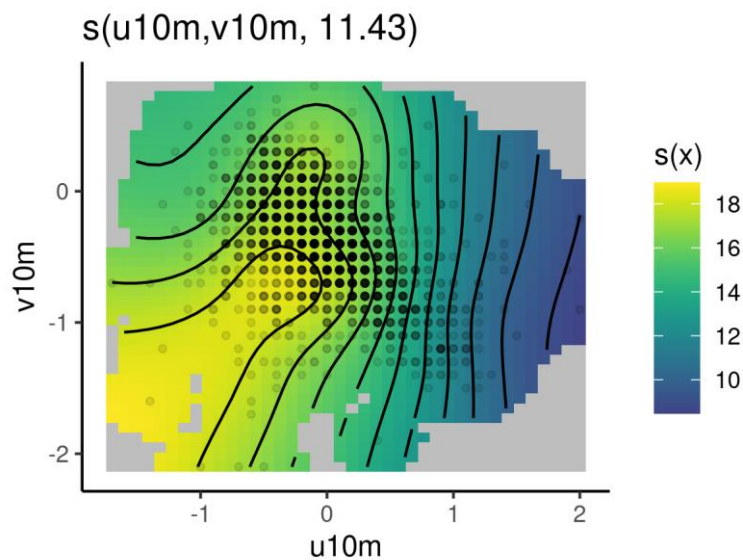

**Figure S7e.** Smooth surface for wind speed variables interaction ( $u_{10m}$ ,  $v_{10m}$ ) selected in the  $PM_{2.5}$  model developed for the air quality monitoring station.

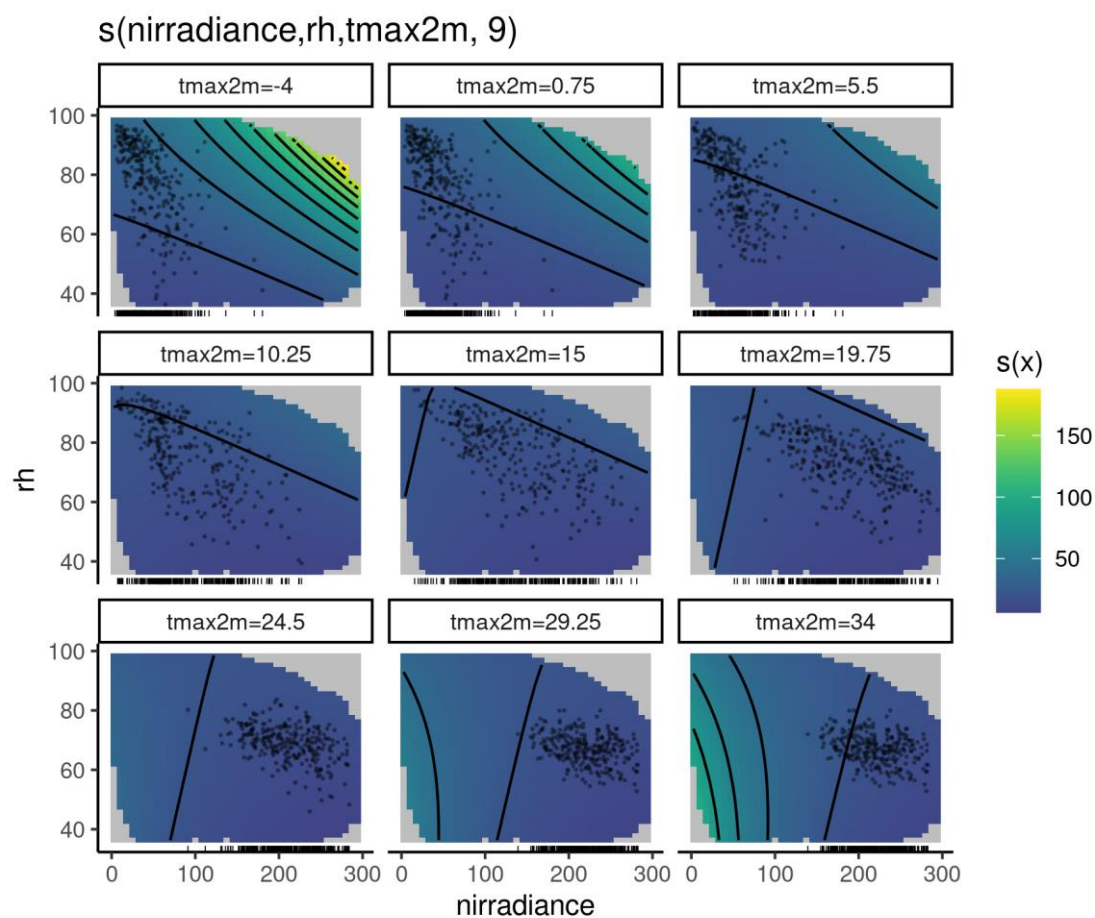

**Figure S7f.** Smooths for multiple meteorological variables interactions selected in the  $\text{PM}_{2.5}$  model developed for the air quality monitoring station.

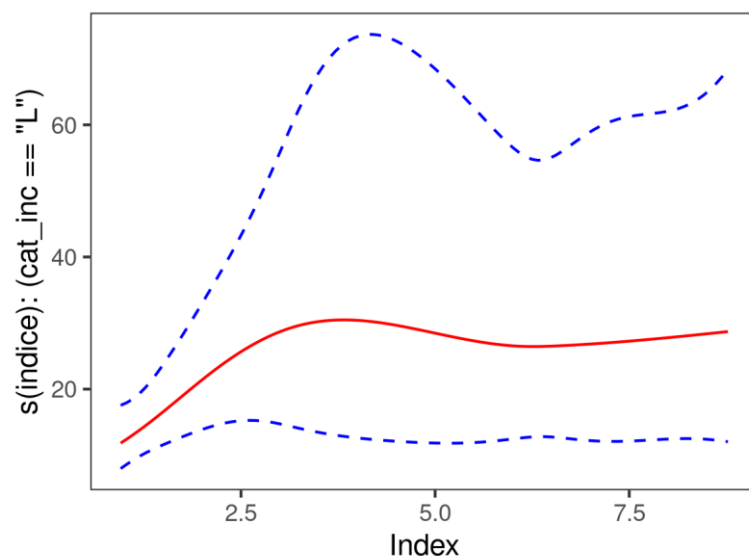

**Figure S7g.** Spline functions for categorical index variable selected in the  $\text{PM}_{2.5}$  model developed for the air quality monitoring station.

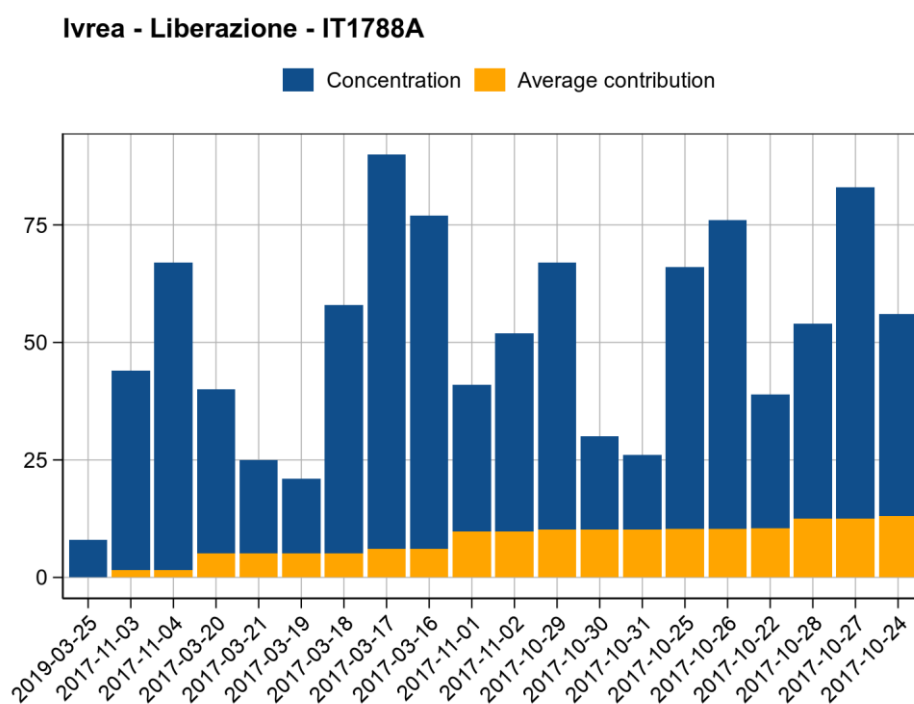

**Figure S7h.** Estimated model contribution of wildfires to daily average concentrations of PM<sub>2.5</sub> observed in the air quality monitoring station.

**Vercelli - CONI IT1878A**

## Vercelli - CONI - IT1878A

Fires within 75km from station

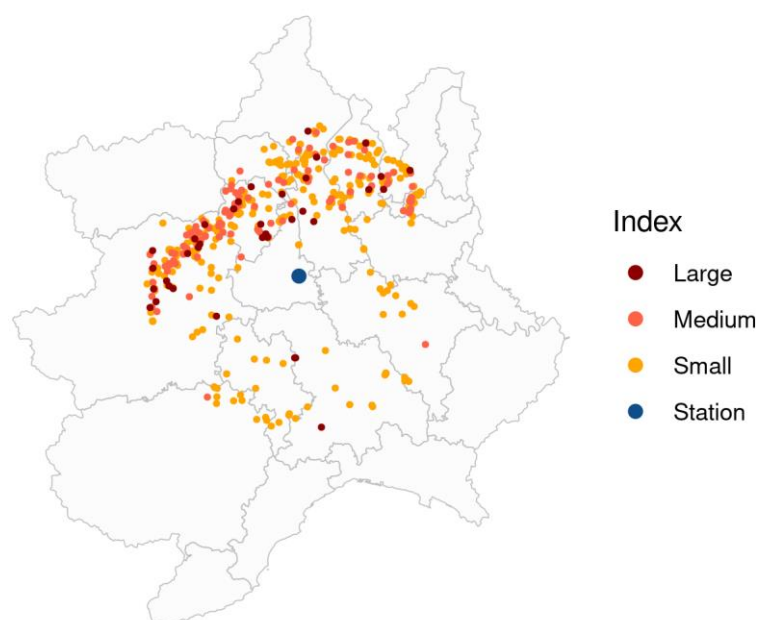

**Figure S8a.** Italy, Piedmont region: wildfires, classified by categorial index variable, within a buffer of 75 km from the air quality monitoring station.

**Table S8.** Italy, Piedmont region: descriptive statistics for wildfires, classified by categorial index variable, within a buffer of 75 km from the air quality monitoring station.

| Variable                  | n   | mean  | sd    | median |
|---------------------------|-----|-------|-------|--------|
| Wooded land area (ha)     | 559 | 15.79 | 125.7 | 0.4766 |
| Not wooded land area (ha) | 220 | 15.35 | 49.75 | 0.1587 |
| Distance (km)             | 559 | 55.36 | 12.45 | 56.49  |
| Burned area (ha)          | 559 | 21.83 | 135.7 | 0.5895 |

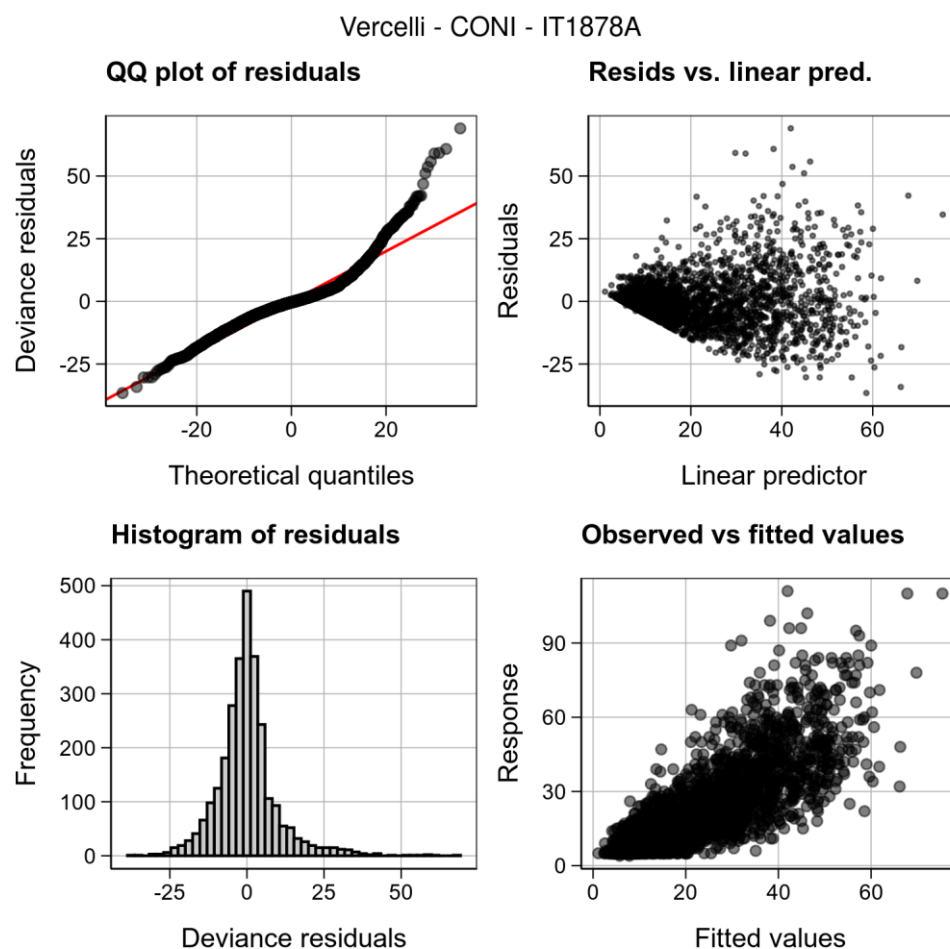

**Figure S8b.** Check of the basic assumptions: residual analysis of the PM<sub>2.5</sub> model developed for the air quality monitoring station.

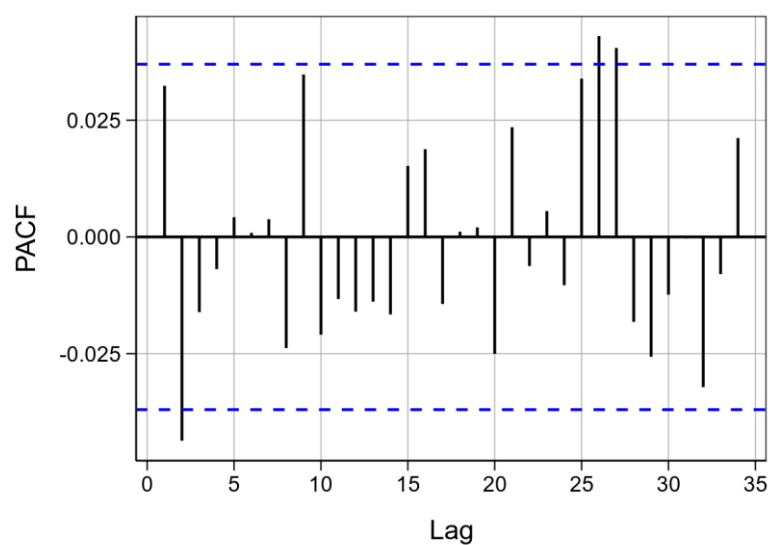

**Figure S8c.** Partial autocorrelation function (PACF) of the residuals at daily lags of the PM<sub>2.5</sub> model developed for the air quality monitoring station.

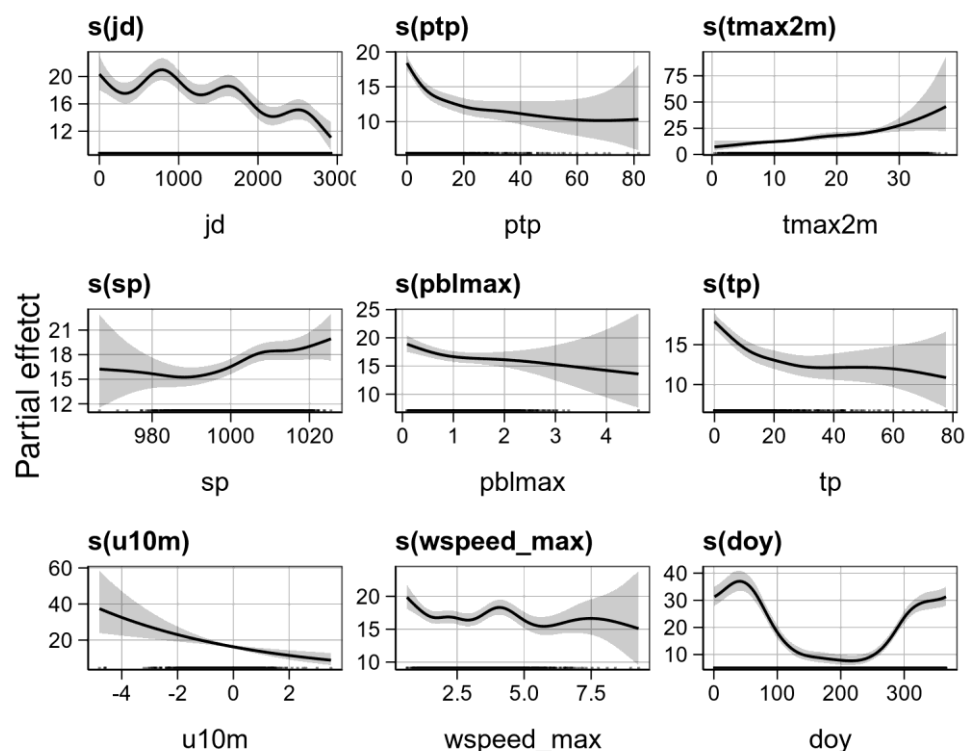

**Figure S8d.** Spline functions for single predictive variables selected in the PM<sub>2.5</sub> model developed for the air quality.

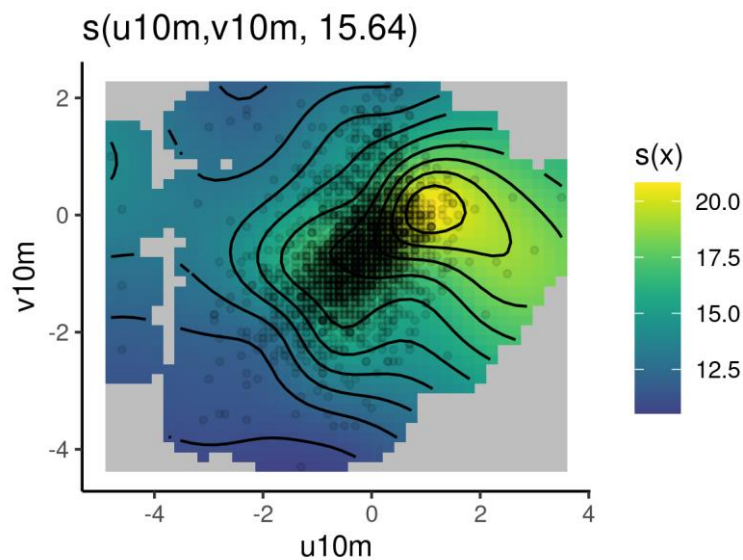

**Figure S8e.** Smooth surface for wind speed variables interaction ( $u_{10m}$ ,  $v_{10m}$ ) selected in the PM<sub>2.5</sub> model developed for the air quality monitoring station.

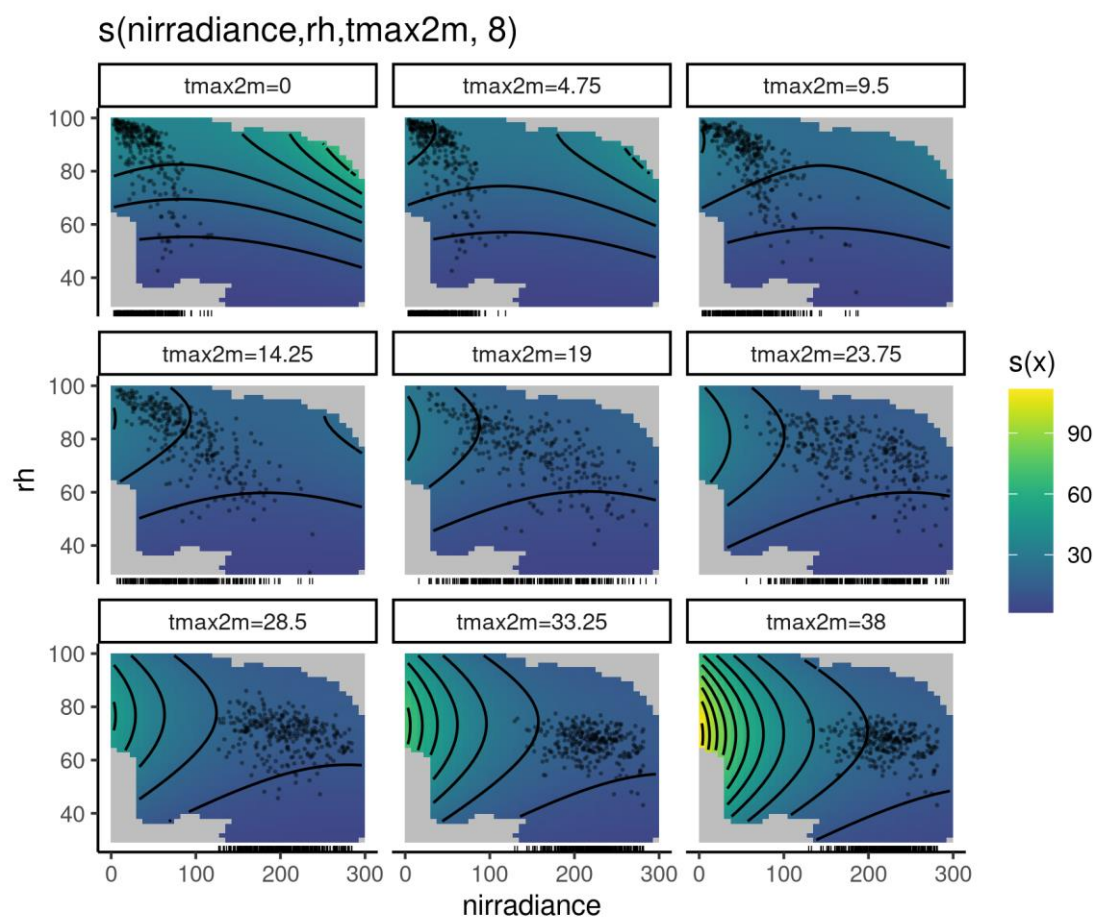

**Figure S8f.** Smooths for multiple meteorological variables interactions selected in the  $\text{PM}_{2.5}$  model developed for the air quality monitoring station.

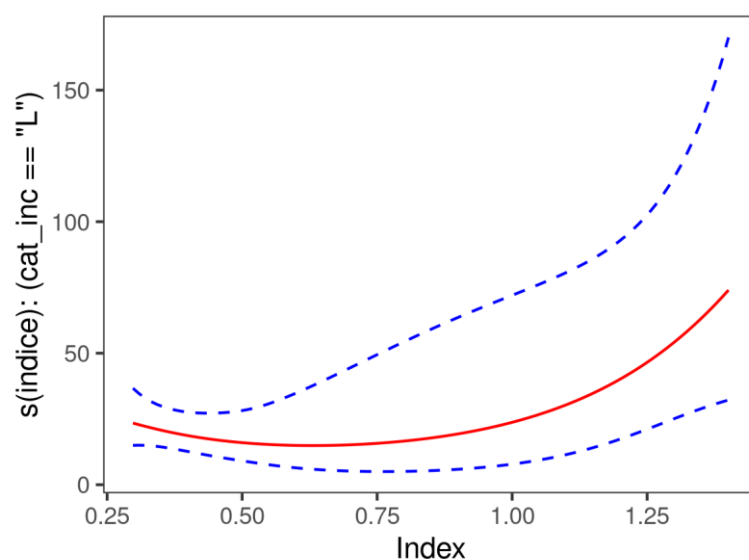

**Figure S8g.** Spline functions for categorical index variable selected in the  $\text{PM}_{2.5}$  model developed for the air quality monitoring station.

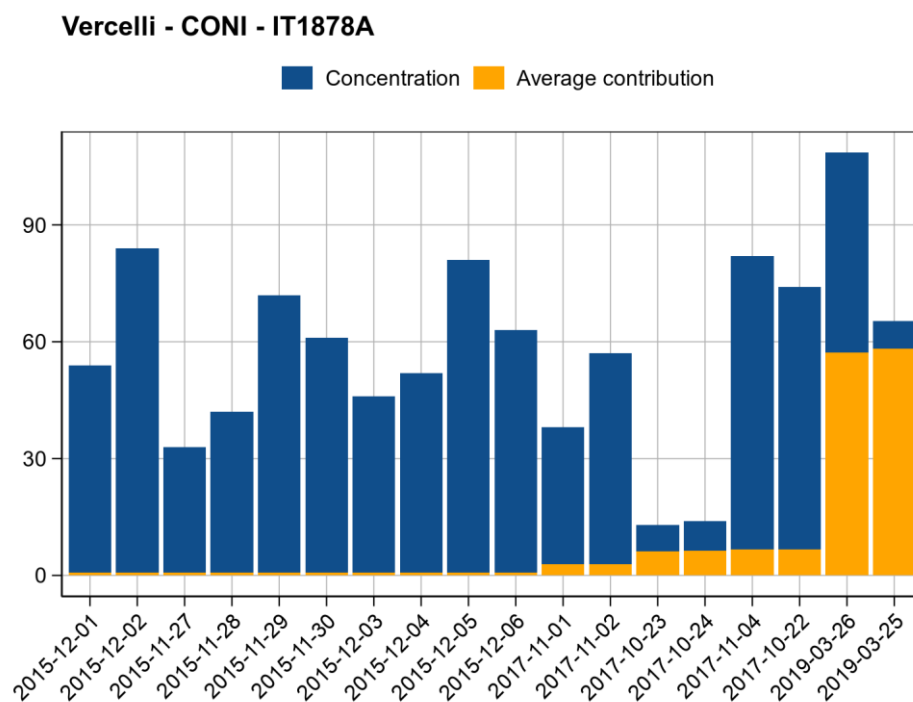

**Figure S8h.** Estimated model contribution of wildfires to daily average concentrations of  $PM_{2.5}$  observed in the air quality monitoring station.

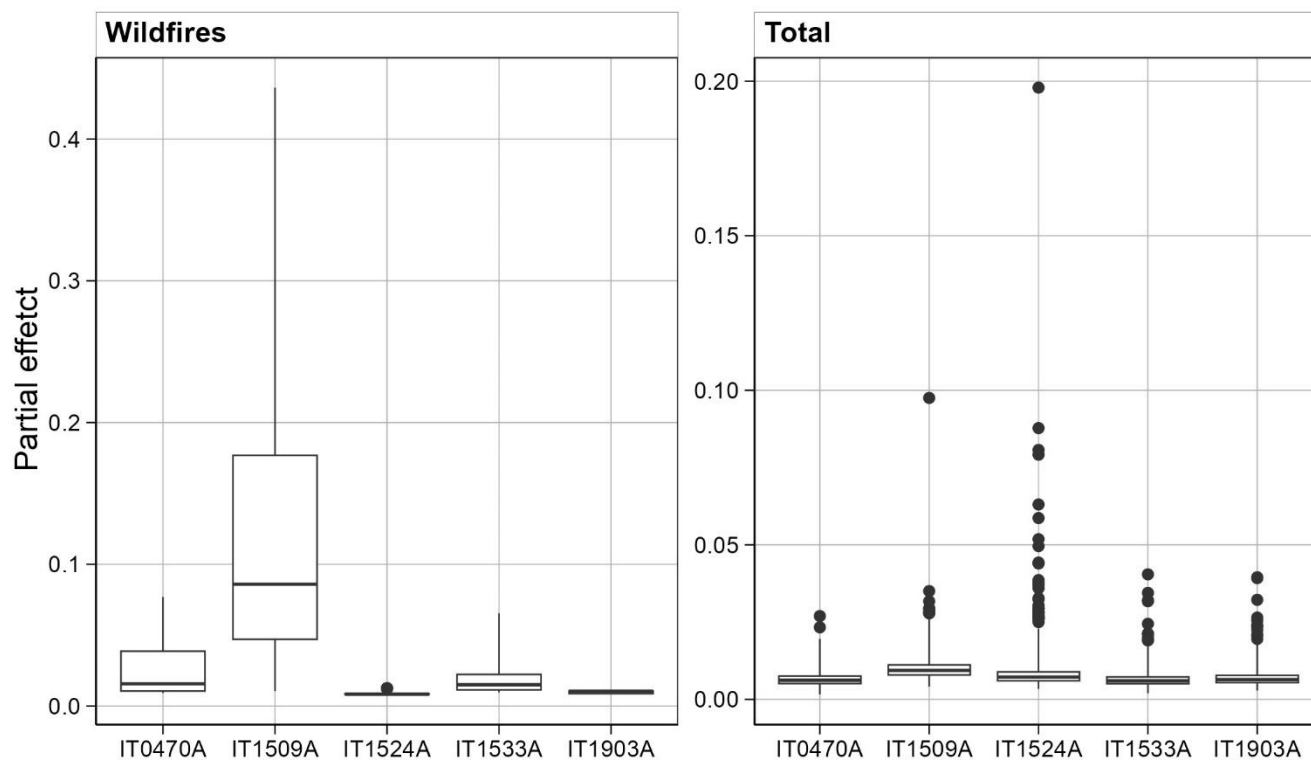

**Figure S9.** Relative uncertainty for,  $PM_{10}$ -models, total (right) and wildfire partial contribution (left).

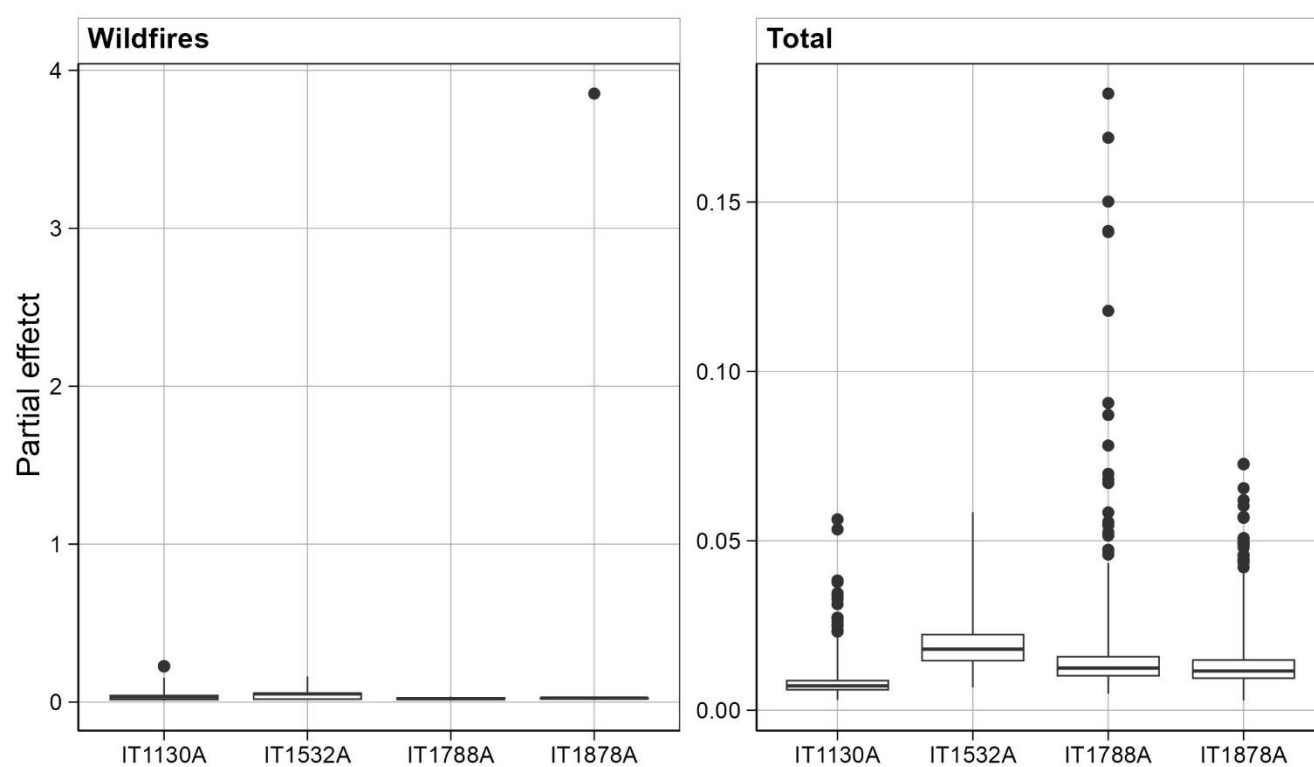

**Figure S10.** Relative uncertainty for, PM<sub>2.5</sub>-models, total (right) and wildfire partial contribution (left).
